1 **Messenger RNA cap methylation by PCIF1 attenuates the interferon- $\beta$  induced antiviral**  
2 **state**

3  
4 Michael A. Tartell<sup>1,2</sup>, Konstantinos Boulias<sup>3,4</sup>, Gabriela Brunsting Hoffmann<sup>4</sup>, Eric Lieberman  
5 Greer<sup>3,4\*</sup> and Sean P. J. Whelan<sup>1\*</sup>

6  
7 <sup>1</sup>Department of Molecular Microbiology, Washington University School of Medicine, St. Louis,  
8 MO, USA, <sup>2</sup>Program in Virology, Harvard Medical School, Boston MA, USA, <sup>3</sup>Department of  
9 Pediatrics, Initiative for RNA Medicine, Harvard Medical School, Boston, MA, USA <sup>4</sup>Division of  
10 Newborn Medicine, Boston Children's Hospital, Boston, MA, USA

11

12 **\*Corresponding author:**

13 S. P. J. Whelan email: [spjwhelan@wustl.edu](mailto:spjwhelan@wustl.edu)

14 E. L. Greer email: [Eric.Greer@childrens.harvard.edu](mailto:Eric.Greer@childrens.harvard.edu)

15

16 **Classification:**

17 Major – Biological Sciences; Minor – Microbiology

18

19 **Keywords:**

20 Innate immunity, RNA modifications, host-pathogen interactions, non-segmented  
21 negative-sense RNA virus, rhabdovirus

22

23

24

25

26

## Abstract

27 Interferons induce cell intrinsic responses associated with resistance to viral  
28 infection. To overcome the suppressive action of interferons and their downstream  
29 effectors viruses have evolved diverse mechanisms. Working with vesicular stomatitis  
30 virus (VSV) we report a role for the host cell N6-adenosine mRNA cap-methylase,  
31 phosphorylated C-terminal domain interacting factor 1 (PCIF1), in attenuating the  
32 antiviral activity of interferon- $\beta$ . Using cell based and *in vitro* biochemical assays we  
33 demonstrate that PCIF1 efficiently modifies VSV mRNA cap structures to m<sup>7</sup>Gpppm<sup>6</sup>A<sub>m</sub>,  
34 and we identify the *cis*-acting elements required for this modification. Under basal  
35 conditions, N6-methylation of VSV mRNA cap structures is functionally inert with regard  
36 to mRNA stability, translation and viral infectivity. Induction of an antiviral state by  
37 treatment of cells with interferon- $\beta$  prior to infection uncovered a functional role for  
38 PCIF1 in attenuation of the antiviral response. Cells lacking PCIF1 or expressing a  
39 catalytically inactive PCIF1, exhibit an augmented effect of interferon- $\beta$  in the inhibition  
40 of viral replication and gene expression. This work identifies a function of PCIF1 and  
41 cap-proximal m<sup>6</sup>A<sub>m</sub> in attenuation of the host response to VSV infection that likely  
42 extends to other viruses.

43

## Significance

44           The cap structure present at the 5' end of eukaryotic mRNAs regulates RNA

45 stability, translation, and marks mRNA as self, thereby impeding recognition by the

46 innate immune system. Cellular transcripts beginning with adenosine are additionally

47 modified at the N6 position of the 2'-O methylated cap-proximal residue by the

48 methyltransferase PCIF1 to m<sup>7</sup>Gpppm<sup>6</sup>A<sub>m</sub>. We define a function for this N6-adenosine

49 methylation in attenuating the interferon-β mediated suppression of viral infection. Cells

50 lacking PCIF1, or defective in its enzymatic activity, augment the cell intrinsic

51 suppressive effect of interferon-β treatment on vesicular stomatitis virus gene

52 expression. VSV mRNAs are efficiently methylated by PCIF1, suggesting this

53 contributes to viral evasion of innate immune suppression.

54

## Introduction

55 Eukaryotic messenger RNAs possess a 5' cap structure that functions in their  
56 stability, translation, and helps discriminates host from aberrant RNA by the innate  
57 immune system (1-4). That mRNA cap structure is formed by the actions of an RNA  
58 triphosphatase that converts pppRNA to ppRNA which serves as substrate for an RNA  
59 guanylyltransferase to transfer GMP derived from GTP onto the 5' end of the RNA to  
60 yield GpppRNA (1, 3, 5). Methylation of that 5' cap-structure by a guanine-N-7  
61 methylase yields m<sup>7</sup>GpppRNA, which is modified by a ribose-2'-O methylase to yield  
62 m<sup>7</sup>GpppN<sub>m</sub> (1, 3). Known activators of the innate immune system include triphosphate  
63 RNA which is recognized by the host pattern recognition receptor, retinoic acid inducible  
64 gene-1 (RIG-1) (4, 6), and cap-structures that lack ribose-2'-O methylation which  
65 renders translation of those RNAs susceptible to inhibition by interferon-induced protein  
66 with tetratricopeptide repeats 1 (IFIT1) (4, 7).

67 Internal RNA modifications also have important functional consequences for the  
68 fate of mRNA, among which is N6-methyladenosine (m<sup>6</sup>A). The methyltransferase  
69 complex METTL3/METTL14 is responsible for m<sup>6</sup>A methylation, which regulates diverse  
70 functions in mRNA localization, stability, splicing, and translation (8, 9). The RNA  
71 modification N6, 2'O di-methyladenosine (m<sup>6</sup>A<sub>m</sub>) present at the cap-proximal position  
72 (m<sup>7</sup>Gpppm<sup>6</sup>A<sub>m</sub>) is regulated separately from m<sup>6</sup>A (10). Cap proximal m<sup>6</sup>A<sub>m</sub> is present on  
73 approximately 30% of cellular mRNA (11-16), but its function is enigmatic. The host  
74 RNA polymerase II associated phosphorylated-CTD interacting factor 1 (PCIF1),  
75 catalyzes formation of cap proximal m<sup>6</sup>A<sub>m</sub> (11-14) that is reported to increase (11, 12,  
76 17), decrease (13), or have no consequence for (18) mRNA stability and translation.

77 Vesicular stomatitis virus (VSV), a non-segmented negative-sense RNA virus,  
78 replicates in the host-cell cytoplasm transcribing 5 mRNAs from the viral genome (19).  
79 The viral large polymerase protein (L) contains the enzymatic activities necessary for  
80 transcription of the 5 mRNAs, including the co-transcriptional addition of a 5' methylated  
81 cap-structure ( $m^7GpppA_m$ ) and synthesis of the 3' poly-A tail (20). The polymerase  
82 synthesizes the mRNAs by recognizing conserved stop and start sequences within each  
83 gene so that each mRNA contains an identical 5' structure  $m^7GpppA_mACAG$  (21-23).  
84 VSV mRNAs isolated from cells are additionally N6-methylated at the cap-proximal  $A_m$   
85 by a presumed cellular methylase to yield  $m^7Gpppm^6A_mACAG$  (24). The efficiency of  
86 VSV transcription is such that at least 65% of total cytoplasmic mRNA corresponds to  
87 the 5 VSV mRNAs by 6 hours post infection (25). The 5 VSV mRNAs and their protein  
88 products have been extensively characterized biochemically (26), and as a result  
89 provide unique probes into the function(s) of  $m^6A_m$ .

90 Here, we demonstrate that VSV mRNAs are efficiently modified at the cap-  
91 proximal nucleotide by host PCIF1. In contrast to the substrate requirements for cellular  
92 mRNA modification, the PCIF1-dependent N6-methylation of VSV mRNA is  
93 independent of prior guanine-N7-methylation of the mRNA cap. Under basal conditions,  
94 VSV mRNA stability and translation are unaffected by the presence of  $m^6A_m$ , and viral  
95 replication is unaltered. Activation of an antiviral response by treatment of cells with  
96 interferon- $\beta$  uncovers a function for PCIF1. Cells lacking PCIF1 or expressing a  
97 catalytically inactive variant of the protein exhibit an augmented suppression of viral  
98 gene expression and infection upon interferon- $\beta$  treatment. The attenuation of the  
99 antiviral activity of interferon- $\beta$  was dependent upon the catalytic activity of PCIF1, thus

100 defining a functional role of this mRNA cap methylation in evading antiviral suppression  
101 of gene expression. This work defines a role of PCIF1 dependent methylation of mRNA  
102 cap-structures in the attenuation of the antiviral response in VSV infected cells that  
103 likely extends to other viruses.

104

105  
106  
107  
108  
109  
110  
111  
112  
113  
114  
115  
116  
117  
118  
119  
120  
121  
122  
123  
124  
125  
126  
127

## Results

### Analysis of VSV mRNA cap-structures isolated from cells.

To examine the methylation status of VSV mRNA cap structures, we infected 293T cells at a MOI of 3, labeled viral RNA by metabolic incorporation of [<sup>32</sup>P]-phosphoric acid in the presence of actinomycin-D from 3-7 hpi, which selectively inhibits host cell transcription, and isolated total poly(A)<sup>+</sup> RNA. Following hydrolysis with nuclease P1 to liberate mononucleotides, and cap-clip acid pyrophosphatase to digest the mRNA cap-structure (Fig 1A), the products were resolved by two-dimensional thin-layer chromatography (2D-TLC) (27) (Fig 1B). The identity of specific spots was determined by their comigration with co-spotted chemical markers (Fig S1A) (17, 27). Analysis of RNA from uninfected cells yields low levels of products that comigrate with pA, pC, pG, and pU reflecting residual actinomycin-D resistant synthesis of RNA in the cell, but no detectable methylated nucleotides (Fig 1B). Nuclease P1 digestion of RNA from infected cells gave rise to abundant pA, pC, pG and pU and two additional spots that comigrate with markers for A<sub>m</sub> and m<sup>6</sup>A (Fig 1B). As nuclease P1 leaves the mRNA cap-structure intact, the presence of A<sub>m</sub> and m<sup>6</sup>A must reflect internal modifications of the viral mRNA, although our analysis cannot discriminate which positions are modified. Prior studies on VSV mRNAs report the presence of A<sub>m</sub> at the second transcribed nucleotide (24), which may account for some of this internal methylation. Further hydrolysis of the RNA purified from infected cells with cap-clip pyrophosphatase leads to the appearance of an additional spot that comigrates with m<sup>6</sup>A<sub>m</sub>, and an increase in intensity of the A<sub>m</sub> spot (Fig 1B). This result demonstrates that VSV mRNA cap structures contain m<sup>7</sup>Gpppm<sup>6</sup>A<sub>m</sub>, as m<sup>6</sup>A<sub>m</sub> only appears upon cap-structure hydrolysis.

128 We interpret the increase in  $A_m$  following cap-clip treatment as reflective of the presence  
129 of a minority of transcripts containing only  $A_m$  at the cap-proximal nucleotide (24).  
130 Quantitative analysis of each spot reveals over 85% of the cap-proximal nucleotides are  
131  $m^6A_m$ , consistent with previous reports (24). Experiments performed in HeLa cells gave  
132 similar results, though no internal  $m^6A$  was detectable in these cells (Fig S1B). We  
133 conclude that VSV mRNAs synthesized in 293T and HeLa cells contain primarily  
134  $m^7Gpppm^6A_m$  and  $m^7Gpppm^6A_mA_m$  cap-structures.

### 135 **PCIF1 modifies VSV mRNA**

136 To determine whether VSV mRNA are modified by PCIF1, the cellular N6-  
137 methyltransferase for mRNA (Fig S2) (11-14), we infected *PCIF1* knockout (KO) cells  
138 and performed RNA analysis as above. Viral mRNA isolated from PCIF1 KO cells  
139 (HeLa or 293T) lacked detectable levels of  $m^6A_m$  (Fig 2A, Fig S1C). Cap-proximal  $m^6A_m$   
140 was restored upon add back of PCIF1 but not a catalytically inactive mutant PCIF1<sub>SPPG</sub>  
141 (Fig 2B). Methylation reactions performed *in vitro* demonstrate that purified PCIF1 but  
142 not PCIF1<sub>SPPG</sub> are responsible for  $m^6A_m$  on VSV mRNA (Fig 2C, S1D). Collectively  
143 these results demonstrate that PCIF1 is necessary and sufficient for formation of cap-  
144 proximal  $m^6A_m$  on VSV mRNA.

### 145 **N7-guanosine methylation is dispensable for PCIF1 modification of VSV mRNA**

146 Substrates for modification by PCIF1 require the presence of a methylated  $m^7G$   
147 mRNA cap structure (11, 12), and capped RNA lacking  $m^7G$  serve as poor substrates  
148 for PCIF1 *in vitro* (14). The obligatory sequential methylation of cellular mRNAs at  $m^7G$   
149 and subsequent ribose-2'-O positions (1) precludes tests of the importance of the 2'-O



150 methylation alone in PCIF1 modification of mRNA. By contrast the mRNA cap  
151 methylation reactions of VSV, and by inference other NNS RNA viruses, proceed in the  
152 opposite order. Experiments conducted with viral mutants and by reconstitution of cap-  
153 methylation *in vitro* demonstrate that cap ribose-2'-O methylation precedes and  
154 facilitates the subsequent guanine-N-7 methylation (28), allowing us to explore the  
155 impact of 2'-O methylation alone on PCIF1 modification of VSV mRNAs. Messenger  
156 RNA synthesized in cells by the viral mutant VSV-L<sub>G1670A</sub> contains primarily GpppA<sub>m</sub>  
157 mRNA caps (29), which serve as effective substrates for PCIF1 (Fig 3A). In agreement  
158 with analysis of viral mRNA made in cells, mRNA transcribed from purified VSV-L<sub>G1670A</sub>  
159 virions are fully methylated by PCIF1 *in vitro* (Fig 3B, S3). Messenger RNA synthesized  
160 by a second viral mutant, VSV-L<sub>G4A</sub>, that produces unmethylated GpppA cap structures  
161 (29), was not modified by PCIF1 (Fig 3C). A low level of m<sup>6</sup>A observed following  
162 hydrolysis of RNA produced by VSV-L<sub>G4A</sub> is consistent with modification at internal  
163 positions of the mRNA (Fig 1B). In agreement with this finding, viral mRNA synthesized  
164 by VSV in the presence of the methylation inhibitor S-adenosyl-homocysteine (SAH), is  
165 poorly methylated by PCIF1 (Fig 3D, S3). Taken together, this set of results  
166 demonstrate in contrast to cellular mRNA modification, VSV mRNA requires ribose-2'-O  
167 methylation and not guanine-N-7 methylation.

### 168 **Effect of m<sup>6</sup>A<sub>m</sub> on viral growth, mRNA stability and translation.**

169 To determine whether PCIF1 modification influences VSV mRNA stability, we  
170 compared the decay of modified and unmodified transcripts. Briefly, mRNA was  
171 specifically isolated from infected PCIF1 KO cells, *in vitro* methylated with purified  
172 PCIF1 where indicated, transfected into uninfected cells, and isolated at the indicated

173 time points. Analysis of the isolated mRNA by electrophoresis on acid-agarose gels  
174 demonstrates that viral mRNA stability is unaffected by the presence of  $m^6A_m$  (Fig 4A,  
175 two-way ANOVA  $p>0.4$ ). The stability of each individual mRNA appeared unaffected by  
176 PCIF1 dependent modification to  $m^6A_m$  when transfected into either wild type or PCIF1  
177 knockout cells (Fig S4).

178 To measure whether mRNA translation was affected by the presence of  $m^6A_m$ ,  
179 we measured the expression of a viral encoded eGFP reporter gene following  
180 transfection of methylated or unmethylated mRNA into PCIF1 KO cells. Measurement of  
181 eGFP by flow cytometry at 7 h post transfection reveals that neither the fraction of  
182 positive cells nor the fluorescence intensity was significantly altered by the presence of  
183  $m^6A_m$  (Fig 4B, S5A). Similar findings on stability and translation were obtained using a  
184 luciferase reporter (Fig S5B-C). To further verify that  $m^6A_m$  does not impact the  
185 translation of VSV mRNA we co-transfected mRNA from two VSV reporter viruses  
186 encoding firefly (Luc) or renilla (Ren) luciferase with opposing methylations. In this  
187 competitive translation experiment the ratio of firefly and renilla translated in transfected  
188 cells was unaffected by the presence of  $m^6A_m$  irrespective of which reporter virus mRNA  
189 was modified (Fig S5D-E). Collectively, these results demonstrate that translation of  
190 VSV mRNA is unaffected by the presence of  $m^6A_m$ .

191 As neither viral mRNA translation nor stability were altered by the presence of  
192  $m^6A_m$ , we next compared the kinetics of viral growth in PCIF1 knockout or addback  
193 cells. Cells were infected at a MOI of 3 and viral titers determined by plaque assay at  
194 various times post infection. The kinetics of viral growth were also unaffected in cells  
195 lacking PCIF1 (Fig 4C, S6). Collectively these data demonstrate that despite extensive

196 modification of the viral mRNAs by PCIF1, viral replication and gene expression are  
197 unaltered by this modification.

### 198 **Interferon- $\beta$ treatment uncovers a role for PCIF1 in the host response to infection.**

199 As cap-methylation at the 2'-O position of the first nucleotide helps distinguish  
200 self from viral RNA during infection (4) we examined whether PCIF1 modification of  
201 mRNA plays a similar role. To examine whether cap-proximal m<sup>6</sup>A<sub>m</sub> helps counter host  
202 cell antiviral responses, we measured how PCIF1 affects the IFN- $\beta$  mediated inhibition  
203 of virus growth. Treatment of cells with IFN- $\beta$  prior to infection uncovered a PCIF1  
204 dependent attenuation of the antiviral effect (Fig 5A, S6). Infection of cells by a VSV-  
205 reporter virus that expresses firefly luciferase, confirmed that PCIF1 attenuates the  
206 suppressive effect of IFN- $\beta$  on viral gene expression at the RNA and protein levels in a  
207 single-round of infection (Fig 5B, S7). This result suggests that the effects of PCIF1 are  
208 restricted to steps of the viral replication cycle up to and including gene expression. To  
209 eliminate viral entry as a possible contributor, we transfected ribonucleoprotein cores  
210 purified from VSV-Luc into cells, thereby bypassing viral entry. Pretreatment of cells  
211 with IFN- $\beta$  was still accompanied by augmented inhibition of gene expression in cells  
212 lacking PCIF1 (Fig 5C). This result demonstrates that the IFN- $\beta$  mediated suppression  
213 of VSV gene-expression is enhanced in cells lacking PCIF1.

214 The antiviral response in HeLa cells is partly attenuated (30), therefore we  
215 examined whether loss of PCIF1 results in a similar IFN- $\beta$  dependent inhibition of viral  
216 replication in A549 cells. We confirmed that VSV mRNAs were also N6-methylated by  
217 PCIF1 in these cells (Fig S8). Pretreatment of A549 cells with IFN- $\beta$  revealed that, in the

218 absence of PCIF1, viral gene expression was suppressed an additional 10-fold as  
219 evident by levels of viral mRNA and protein (Fig 5D). Measurements of specific viral  
220 proteins following metabolic incorporation of [<sup>35</sup>S]-met and [<sup>35</sup>S]-cys followed by analysis  
221 of proteins on SDS-PAGE demonstrates that the 3 most abundant viral proteins, N, M  
222 and G are further suppressed in cells lacking PCIF1 (Fig 5E, S9), but cellular translation  
223 in uninfected cells is unaffected (Fig 5E, S9).

224         To rule out the possibility of N6-methylation independent activities of PCIF1  
225 mediating this effect, we examined infection in cells expressing a catalytically-inactive  
226 mutant of PCIF1, PCIF1<sub>SPPG</sub> (Fig 2B). Both PCIF1<sub>SPPG</sub> addback and PCIF1 knockout  
227 equivalently augmented the effect of IFN-β on VSV-luciferase gene expression (Fig 5F)  
228 and on viral growth (Fig 5G). Collectively, the above experiments reveal that loss of  
229 PCIF1 or its ability to synthesize m<sup>6</sup>A<sub>m</sub> augments the suppressive effect of IFN-β on  
230 VSV gene expression, suggesting that m<sup>6</sup>A<sub>m</sub> methylation of viral mRNAs protects  
231 against the otherwise antiviral effects of the IFN-mediated innate immune response.

232

233

## Discussion

234           The major finding of this study is the identification of a role for PCIF1-mediated  
235  $m^6A_m$  methylation in the type I interferon response to VSV infection. We demonstrate  
236 that loss of PCIF1 enhances the sensitivity of viral replication to pretreatment of cells  
237 with IFN- $\beta$  by affecting VSV gene expression. PCIF1 is necessary and sufficient for  
238 modification of VSV mRNA to yield cap-proximal  $m^6A_m$ , and in contrast to cellular mRNA  
239 modification, viral mRNAs require prior ribose-2'-O but not guanine-N-7 methylation of  
240 the cap-structure. The most parsimonious explanation of our results is that the PCIF1  
241 dependent modification of viral mRNA cap-structures to  $m^6A_m$  serves to dampen an  
242 IFN- $\beta$  mediated suppression of gene expression. Mechanistically, how this occurs was  
243 not resolved by the present study but we posit that this requires discrimination of  
244 modified from unmodified RNA by an interferon stimulated gene (ISG).

245           Precedent for a role of mRNA cap modifications in the antiviral response already  
246 exists. The RIG-I dependent recognition of a 5' triphosphate is suppressed by the  
247 presence of an mRNA cap-structure (4, 6), and ribose 2'-O methylation of the cap-  
248 structure inhibits the ability of an ISG, IFIT1, to suppress translation of mRNA (4, 7).  
249 The PCIF1 dependent modification of VSV mRNA cap-structures may work by a similar  
250 mechanism by helping viral mRNA appear more host like. Additional work will be  
251 necessary to define whether an ISG is required to discriminate between  $m^6A_m$  modified  
252 and unmodified cap-structures. We suggest that it is unlikely that IFIT1 functions in this  
253 discrimination based on its known recognition of  $m^7GpppA$  cap-structures (31) and the  
254 requirement for 2'-O modification of VSV mRNA for their subsequent PCIF1  
255 modification (32).

256           Although we establish a role of PCIF1 and m<sup>6</sup>A<sub>m</sub> in the IFN-β mediated  
257 suppression of VSV gene expression, and demonstrate that viral mRNAs are modified  
258 by PCIF1, modification of cellular mRNA may also play a role. Cap proximal m<sup>6</sup>A<sub>m</sub>  
259 inhibits the host mRNA decapping enzyme DCP2 (17), which may alter stability of  
260 cellular mRNAs including those induced on treatment of cells with IFN-β (33). This  
261 seems unlikely to account for the effects we observe on VSV infection, as the DCP2  
262 dependent decapping and degradation of cellular mRNA would be expected to increase  
263 in cells lacking PCIF1, likely dampening rather than augmenting the effect of IFN-β  
264 treatment. If the antiviral response is due to m<sup>6</sup>A<sub>m</sub> modification of cellular mRNA this  
265 contrasts with the consequences of 2'-O methylation of the mRNA cap structure of ISG  
266 mRNAs which enhances their expression (34). We are also mindful of the possibility  
267 that PCIF1 may have unknown functions in the cell beyond N6-methylation of mRNA.  
268 Insects, including *Drosophila*, express an ortholog of PCIF1 that associates with the  
269 phosphorylated CTD of PolIII, but is catalytically inactive as an RNA N6-  
270 methyltransferase (35). As the catalytic activity of PCIF1 is required for attenuation of  
271 the antiviral response we also find this explanation unlikely.

272           The substrate requirements for PCIF1 modification of VSV mRNA differ to those  
273 previously shown in cellular mRNA (11, 14). Specifically, we found that guanine-N7-  
274 methylation was dispensable for N6-methylation, and that ribose 2'-O methylation was  
275 required. Although we do not understand why this is the case, we recapitulate the  
276 substrate specificity *in vitro* making it unlikely that this distinction reflects the  
277 cytoplasmic modification of viral mRNA rather than the nuclear modification of cellular  
278 mRNA. This altered specificity for modification of the VSV mRNA coupled with the

279 altered recognition specificity of the VSV cap methylation machinery - which requires 2'-  
280 O methylation prior to guanine-N-7 methylation – raise the possibility that the structure  
281 of the 5' end of VSV mRNAs leads to the altered specificity (29).

282         The finding that PCIF1 and m<sup>6</sup>A<sub>m</sub> affect the antiviral response raises the question  
283 of why modify cap-proximal A and not other cap-proximal bases. More cellular mRNAs  
284 initiate with G than A (16), but guanosine is typically only methylated at the 2'O position  
285 in mRNA (36). This is likely because O6-methylation of guanosine (m<sup>6</sup>G) has been  
286 shown to have a large fitness cost. Its presence in DNA is highly mutagenic though  
287 pairing with thymidine during DNA replication, and when present in RNA, it causes  
288 incorrect ribosome decoding (37) and a 1000-fold decrease in the peptide-bond  
289 formation rate (38). N6-methylation in adenosine, by contrast, has minimal effect on  
290 these processes (37, 38).

291         The importance of m<sup>6</sup>A<sub>m</sub> for other viruses has not been examined. As expected,  
292 the mRNAs of DNA viruses which rely on host RNA polymerases for transcription,  
293 including adenoviruses (39, 40), simian virus 40 (41), herpes simplex virus 1 (42), and  
294 polyomaviruses (43) contain m<sup>6</sup>A<sub>m</sub> (1, 3). Vaccinia virus, which replicates in the  
295 cytoplasm, also produces m<sup>6</sup>A<sub>m</sub> containing mRNA (1, 3, 44), likely through modification  
296 by PCIF1. It remains largely unexplored for other RNA viruses which produce mRNAs  
297 that initiate with A. The evolution by many viruses of their own capping machinery also  
298 begs the question of whether viruses have evolved a PCIF1-like cap modifying enzyme,  
299 particularly given the potential advantage in the face of an antiviral response. Additional  
300 studies with VSV and other viruses will be required to fully define the role of PCIF1 in  
301 the host response to infection. Rabies virus, for example, also produces 5 mRNAs that

302 initiate with a similar sequence to those of VSV and therefore are likely to be modified  
303 by PCIF1. VSV and rabies antagonize the innate immune response through distinct  
304 mechanisms suggesting that this comparison may help further illuminate the role of  
305 PCIF1 in the host response to infection (45-47).

306



307

## Materials and methods

308 **Cells:** HEK293T, HeLa, A549, Vero CCL81, and BsrT7/5 cells were maintained in  
309 humidified incubators at 37 °C and 5% CO<sub>2</sub> in DMEM supplemented with L-glutamine,  
310 sodium pyruvate, glucose, (Corning #10013CV) and 10% fetal bovine serum (Tissue  
311 Culture Biologicals #101). Generation of HEK293T and HeLa *PCIF1*-knockout cell lines  
312 and addbacks were previously described (12), and A549 *PCIF1*-knockout cell lines were  
313 generated and verified using these same methods. Cells were tested regularly using  
314 the e-Myco PLUS PCR kit (Bulldog Bio #2523348).

315 **Viruses:** VSV (as rescued from an infectious cDNA clone of VSV, pVSV(1)+), VSV-  
316 L<sub>G1670A</sub>, VSV-L<sub>G4A</sub>, VSV-luciferase, VSV-RenillaP, and VSV-eGFP have been described  
317 previously (29, 48-51). Viruses were propagated in BsrT7/5 cells.

318 **Radiolabeling of mRNA:** Cap-proximal nucleotides were radiolabeled as previously  
319 described (17). For specific radiolabeling of VSV mRNA, cells were infected or mock  
320 infected with VSV at a MOI of 3 in serum/phosphate-free DMEM (Gibco #11971-025).  
321 10 µg ml<sup>-1</sup> Actinomycin D (Sigma #A5156) was added to halt cellular transcription at 2.5  
322 hpi, and at 3 hours post infection, 100 µCi ml<sup>-1</sup> [<sup>32</sup>P] phosphoric acid added to label  
323 newly synthesized RNA (Perkin Elmer #NEX053H). RNA was harvested in Trizol  
324 (Thermofisher #15596018) and poly(A)+ mRNA selected using the NEB Magnetic  
325 mRNA Isolation Kit (NEB S1550S).

326 **Identification of methylated nucleotide levels by two-dimensional thin layer**  
327 **chromatography (2D-TLC):** 2 µg mRNA suspended in 6 µl RNase-free H<sub>2</sub>O was  
328 digested with 2 units of nuclease P1 (Sigma N8630) for 3 h at 37 °C. The volume was  
329 then increased to 20 µl and RNA further digested with 2 units of Cap-Clip Acid  
330 Pyrophosphatase for 3 h (Cell Script #C-CC15011H) in the manufacturer's buffer. 2D-

331 TLC was performed as previously described (27). Plates were developed in the first  
332 dimension with 5 parts isobutyric acid (Sigma #I1754) to 3 parts 0.5 M ammonia (VWR  
333 #BDH153312K) for 14 h, and in the second dimension with a solvent of 70 parts  
334 isopropanol, 15 parts hydrochloric acid, and 15 parts water for 20 h. RNA species were  
335 positively identified by UV-shadowing (254 nm) of co-spotted (non-radioactive)  
336 commercially available standards (5' monophosphate forms). The standards  $A_m$  and  
337  $m^6A_m$  5' monophosphate were generated by digesting their triphosphate forms (TriLink  
338 N-1015 and N-1112) with 1 unit Apyrase (NEB M0398).

339 **In vitro transcription of VSV mRNA and methylation with PCIF1:** VSV or VSV-  
340  $L_{G1670A}$  mRNA was synthesized *in vitro* as previously described with 30  $\mu$ Ci [ $^{32}$ P]- $\alpha$ -ATP  
341 per reaction (29, 52). RNA was extracted in trizol, poly(A) selected, and extracted in  
342 trizol again to concentrate the samples. Purified recombinant GST-PCIF1 was  
343 generated and used to in vitro methylate 225 ng of this mRNA as previously described  
344 (12).

345 **Purification, selection, and in vitro methylation of VSV mRNA from cells:** HEK  
346 293T *PCIF1* KO cells were infected at a MOI of 10 for 7 h. RNA was extracted in trizol,  
347 and VSV mRNAs selected using a biotinylated oligo against the conserved stop and  
348 poly(A) sequence present at the 3' end of VSV mRNAs ("Biotin-VSVstop"). 1.5 nmol  
349 oligo was annealed to this mRNA by incubating at 65 °C for 5 min, followed by cooling  
350 on ice for 5 min, and complexes isolated by pulldown with NEB Streptavidin Magnetic  
351 Beads (NEB #S1420, manufacturer's protocol). Following cleanup by trizol extraction,  
352 mRNA was purified further using the NEB poly(A) magnetic kit as above, and trizol

353 extracted again. This stock of RNA from PCIF1 KO cells was then *in vitro* methylated  
354 (or mock methylated) with purified PCIF1 as above.

355 **Determination of VSV mRNA stability:** Biotin-VSVstop selected mRNAs were  
356 transfected into HeLa WT or *PCIF1* KO cells. RNA was transfected into separate wells  
357 of a 24 well plate ( $2 \times 10^5$  cells; 500 ng RNA per well) using Lipofectamine 2000  
358 (Thermofisher #11668019), media was changed at 3 h post transfection, and wells  
359 harvested in trizol at 1 h intervals for 4 h. Extracted mRNAs were separated by  
360 electrophoresis on acid-agarose gels, which were dried and exposed to a phosphor  
361 screen. VSV mRNAs levels were quantified using ImageQuant version 8.2, and  
362 normalized to the 0 h timepoint.

363 **Transfection and flow-cytometry analysis of translation of VSV mRNA:** 500 ng  
364 Biotin-VSVstop selected VSV mRNAs were transfected into  $2 \times 10^5$  HeLa WT or *PCIF1*  
365 KO cells using Lipofectamine 2000. At 6 hours post transfection, cells were trypsinized,  
366 and washed and resuspended in PBS. Half the cells were analyzed for GFP expression  
367 by flow cytometry (BD FACS Calibur); GFP positive cells and mean fluorescence  
368 intensity of GFP were calculated in FlowJo (20,000 cells analyzed per replicate)

369 **Determination of VSV mRNA gene expression by luciferase luminescence and**  
370 **RT-qPCR:** :  $2 \times 10^5$  cells (24 well format; transfection experiments) or  $4 \times 10^5$  cells (12  
371 well format; IFN experiments) were lysed in 120  $\mu$ l passive lysis buffer (Promega  
372 #E1941). Half the lysate was used to quantify luciferase protein (Promega Luciferase  
373 Assay System #E1501) using a Spectramax L luminometer with reagent injectors in  
374 technical triplicate. RNA was extracted from the other half of cells in trizol, and 1  $\mu$ g  
375 reverse transcribed using SuperScript III (Invitrogen #18080044), oligo-dT primers (IDT

376 #51011501), and RNase inhibitors (Promega #N2515). Real-time qPCR was performed  
377 using Fast SYBR Green (Thermofisher #4385612) in technical duplicate. Relative RNA  
378 was calculated as  $\Delta\Delta CT$  (normalized to GAPDH) times  $10^4$ .

379 **Detection of Radiolabeled Samples:** Gels were fixed in 30% methanol, 10% acetic  
380 acid, washed twice in methanol, and dried using a vacuum pump gel dryer. TLC plates  
381 were air dried. Dried gels or plates were then exposed to a phosphor screen and  
382 scanned on a Typhoon scanner.

383 **Growth Curve with IFN pretreatment:** HeLa cells were pretreated with  $500 \text{ U ml}^{-1}$  IFN-  
384  $\beta$  (Tonbo Biosciences 21-8699) or vehicle (0.1% BSA) for 5 h in serum free DMEM.  
385 Cells were washed, and infected with VSV at a MOI of 3 for 1 h in serum free DMEM.  
386 After 1 hour, the inoculum was removed, cells washed, and supplemented with 2%  
387 FBS. At 2, 4, 6, 8, and/or 11 hours post infection, 1% of the supernatant was removed  
388 and frozen at  $-80 \text{ }^\circ\text{C}$ . After all samples had been collected, viral titers were determined  
389 by plaque assay on vero cells.

390 **Gene expression with IFN pretreatment:** HeLa or A549 cells were pretreated with  $500$   
391  $\text{ U ml}^{-1}$  IFN- $\beta$  as above for 5 h, infected with VSV-Luc at a MOI of 3, and at 6 hours post  
392 infection, cells were lysed and processed for luciferase protein and mRNA quantitation.  
393 Alternatively, VSV-Luc RNPs were purified as previously described, and 50 ng  
394 transfected into HeLa cells instead of infection with virus.

395 **Metabolic Radiolabeling of Protein:**  $4 \times 10^5$  A549 cells were pretreated with  $500 \text{ U ml}^{-1}$   
396 IFN- $\beta$  as above for 5 h, and infected or mock infected with wild type VSV at MOI 5. At 5  
397 hours post infection, cells were washed, and the media changed to methionine/cysteine  
398 free DMEM (Gibco #21013-024). After 40 minutes of starvation, cells were pulse

399 labeled with 30  $\mu\text{Ci ml}^{-1}$  [ $^{35}\text{S}$ ] methionine (Perkin Elmer #NEG009T) and 30  $\mu\text{Ci ml}^{-1}$   
400 [ $^{35}\text{S}$ ] cysteine (Perkin Elmer #NEG022T) for 20 minutes. Cells were then lysed in SDS  
401 sample buffer and run on a low-bis 10% SDS-PAGE gel. Protein translation was  
402 determined by phosphorimaging as above. Equal loading was determined by staining  
403 with 0.25% Coomassie Brilliant Blue G-250.

404 **Data analysis and replicates:** All experiments were performed with n=3 or n=4  
405 biological replicates (as indicated). Each qPCR biological replicate is the average of  
406 technical duplicates from the same sample. All qPCR biological replicates (except Fig  
407 5F) were run and analyzed on the same plate, enabling a standard deviation to be  
408 calculated for all samples. Each luciferase biological replicate is the average of  
409 technical triplicates from the same sample. Statistical tests were performed in Microsoft  
410 Excel, graphs were generated in Graphpad Prism 8.

411

412

#### **Acknowledgments:**

413 Thanks to members of the S.P.J.W. laboratory who provided insightful discussions and  
414 advice. This project was supported by NIH Grants F31AI138448 (to M.A.T),  
415 T32AI007245 (to S.P.J.W.), AI059371 (to S.P.J.W.), DP2AG055947 (to E.L.G), and  
416 R21HG010066 (to E.L.G).

417

## References:

- 418 1. Furuichi Y (2015) Discovery of m(7)G-cap in eukaryotic mRNAs. *Proceedings of*  
419 *the Japan Academy. Series B, Physical and biological sciences* 91(8):394-409.
- 420 2. Furuichi Y, LaFiandra A, & Shatkin AJ (1977) 5'-Terminal structure and mRNA  
421 stability. *Nature* 266(5599):235-239.
- 422 3. Furuichi Y & Shatkin AJ (2000) Viral and cellular mRNA capping: past and  
423 prospects. *Advances in virus research* 55:135-184.
- 424 4. Leung DW & Amarasinghe GK (2016) When your cap matters: structural insights  
425 into self vs non-self recognition of 5' RNA by immunomodulatory host proteins.  
426 *Current opinion in structural biology* 36:133-141.
- 427 5. Shuman S (1995) Capping enzyme in eukaryotic mRNA synthesis. *Progress in*  
428 *nucleic acid research and molecular biology* 50:101-129.
- 429 6. Hornung V, *et al.* (2006) 5'-Triphosphate RNA is the ligand for RIG-I. *Science*  
430 314(5801):994-997.
- 431 7. Hyde JL & Diamond MS (2015) Innate immune restriction and antagonism of viral  
432 RNA lacking 2-O methylation. *Virology* 479-480:66-74.
- 433 8. Meyer KD & Jaffrey SR (2014) The dynamic epitranscriptome: N6-  
434 methyladenosine and gene expression control. *Nature reviews. Molecular cell*  
435 *biology* 15(5):313-326.
- 436 9. Meyer KD & Jaffrey SR (2017) Rethinking m(6)A Readers, Writers, and Erasers.  
437 *Annual review of cell and developmental biology* 33:319-342.
- 438 10. Keith JM, Ensinger MJ, & Mose B (1978) HeLa cell RNA (2'-O-methyladenosine-  
439 N6-)-methyltransferase specific for the capped 5'-end of messenger RNA. *The*  
440 *Journal of biological chemistry* 253(14):5033-5039.
- 441 11. Akichika S, *et al.* (2019) Cap-specific terminal N (6)-methylation of RNA by an  
442 RNA polymerase II-associated methyltransferase. *Science* 363(6423).
- 443 12. Boulias K, *et al.* (2019) Identification of the m(6)Am Methyltransferase PCIF1  
444 Reveals the Location and Functions of m(6)Am in the Transcriptome. *Molecular*  
445 *cell* 75(3):631-643 e638.
- 446 13. Sendinc E, *et al.* (2019) PCIF1 Catalyzes m6Am mRNA Methylation to Regulate  
447 Gene Expression. *Molecular cell* 75(3):620-630 e629.
- 448 14. Sun H, Zhang M, Li K, Bai D, & Yi C (2019) Cap-specific, terminal N(6)-  
449 methylation by a mammalian m(6)Am methyltransferase. *Cell research* 29(1):80-  
450 82.
- 451 15. Wei C, Gershowitz A, & Moss B (1975) N6, O2'-dimethyladenosine a novel  
452 methylated ribonucleoside next to the 5' terminal of animal cell and virus mRNAs.  
453 *Nature* 257(5523):251-253.
- 454 16. Wei CM, Gershowitz A, & Moss B (1976) 5'-Terminal and internal methylated  
455 nucleotide sequences in HeLa cell mRNA. *Biochemistry* 15(2):397-401.
- 456 17. Mauer J, *et al.* (2017) Reversible methylation of m(6)Am in the 5' cap controls  
457 mRNA stability. *Nature* 541(7637):371-375.
- 458 18. Wei J, *et al.* (2018) Differential m(6)A, m(6)Am, and m(1)A Demethylation  
459 Mediated by FTO in the Cell Nucleus and Cytoplasm. *Molecular cell* 71(6):973-  
460 985 e975.

- 461 19. Baltimore D, Huang AS, & Stampfer M (1970) Ribonucleic acid synthesis of  
462 vesicular stomatitis virus, II. An RNA polymerase in the virion. *Proceedings of the*  
463 *National Academy of Sciences of the United States of America* 66(2):572-576.
- 464 20. Liang B, *et al.* (2015) Structure of the L Protein of Vesicular Stomatitis Virus from  
465 Electron Cryomicroscopy. *Cell* 162(2):314-327.
- 466 21. Barr JN, Whelan SP, & Wertz GW (1997) cis-Acting signals involved in  
467 termination of vesicular stomatitis virus mRNA synthesis include the conserved  
468 AUAC and the U7 signal for polyadenylation. *Journal of virology* 71(11):8718-  
469 8725.
- 470 22. Stillman EA & Whitt MA (1997) Mutational analyses of the intergenic dinucleotide  
471 and the transcriptional start sequence of vesicular stomatitis virus (VSV) define  
472 sequences required for efficient termination and initiation of VSV transcripts.  
473 *Journal of virology* 71(3):2127-2137.
- 474 23. Wang JT, McElvain LE, & Whelan SP (2007) Vesicular stomatitis virus mRNA  
475 capping machinery requires specific cis-acting signals in the RNA. *Journal of*  
476 *virology* 81(20):11499-11506.
- 477 24. Moyer SA & Banerjee AK (1976) In vivo methylation of vesicular stomatitis virus  
478 and its host-cell messenger RNA species. *Virology* 70(2):339-351.
- 479 25. Neidermyer WJ, Jr. & Whelan SPJ (2019) Global analysis of polysome-  
480 associated mRNA in vesicular stomatitis virus infected cells. *PLoS pathogens*  
481 15(6):e1007875.
- 482 26. Knipe DM & Howley P (2013) *Fields Virology* (Wolters Kluwer, Lippincott  
483 Williams & Wilkins., Philadelphia) 6 Ed.
- 484 27. Kruse S, *et al.* (2011) A novel synthesis and detection method for cap-associated  
485 adenosine modifications in mouse mRNA. *Scientific reports* 1:126.
- 486 28. Rahmeh AA, Li J, Kranzusch PJ, & Whelan SP (2009) Ribose 2'-O methylation of  
487 the vesicular stomatitis virus mRNA cap precedes and facilitates subsequent  
488 guanine-N-7 methylation by the large polymerase protein. *Journal of virology*  
489 83(21):11043-11050.
- 490 29. Li J, Wang JT, & Whelan SP (2006) A unique strategy for mRNA cap methylation  
491 used by vesicular stomatitis virus. *Proceedings of the National Academy of*  
492 *Sciences of the United States of America* 103(22):8493-8498.
- 493 30. Wang G, Kouwaki T, Okamoto M, & Oshiumi H (2019) Attenuation of the Innate  
494 Immune Response against Viral Infection Due to ZNF598-Promoted Binding of  
495 FAT10 to RIG-I. *Cell reports* 28(8):1961-1970 e1964.
- 496 31. Abbas YM, *et al.* (2017) Structure of human IFIT1 with capped RNA reveals  
497 adaptable mRNA binding and mechanisms for sensing N1 and N2 ribose 2'-O  
498 methylations. *Proceedings of the National Academy of Sciences of the United*  
499 *States of America* 114(11):E2106-E2115.
- 500 32. Johnson B, *et al.* (2018) Human IFIT3 Modulates IFIT1 RNA Binding Specificity  
501 and Protein Stability. *Immunity* 48(3):487-499 e485.
- 502 33. Li Y, Dai J, Song M, Fitzgerald-Bocarsly P, & Kiledjian M (2012) Dcp2 decapping  
503 protein modulates mRNA stability of the critical interferon regulatory factor (IRF)  
504 IRF-7. *Molecular and cellular biology* 32(6):1164-1172.

- 505 34. Williams GD, Gokhale NS, Snider DL, & Horner SM (2020) The mRNA Cap 2'-O-  
506 Methyltransferase CMTR1 Regulates the Expression of Certain Interferon-  
507 Stimulated Genes. *mSphere* 5(3).
- 508 35. Pandey RR, *et al.* (2020) The Mammalian Cap-Specific m(6)Am RNA  
509 Methyltransferase PCIF1 Regulates Transcript Levels in Mouse Tissues. *Cell*  
510 *reports* 32(7):108038.
- 511 36. Limbach PA, Crain PF, & McCloskey JA (1994) Summary: the modified  
512 nucleosides of RNA. *Nucleic acids research* 22(12):2183-2196.
- 513 37. You C, Dai X, & Wang Y (2017) Position-dependent effects of regioisomeric  
514 methylated adenine and guanine ribonucleosides on translation. *Nucleic acids*  
515 *research* 45(15):9059-9067.
- 516 38. Hudson BH & Zaher HS (2015) O6-Methylguanosine leads to position-dependent  
517 effects on ribosome speed and fidelity. *Rna* 21(9):1648-1659.
- 518 39. Sommer S, *et al.* (1976) The methylation of adenovirus-specific nuclear and  
519 cytoplasmic RNA. *Nucleic acids research* 3(3):749-765.
- 520 40. Moss B & Koczot F (1976) Sequence of methylated nucleotides at the 5'-  
521 terminus of adenovirus-specific RNA. *Journal of virology* 17(2):385-392.
- 522 41. Haegeman G & Fiers W (1978) Characterization of the 5'-terminal capped  
523 structures of late simian virus 40-specific mRNA. *Journal of virology* 25(3):824-  
524 830.
- 525 42. Moss B, Gershowitz A, Stringer JR, Holland LE, & Wagner EK (1977) 5'-Terminal  
526 and internal methylated nucleosides in herpes simplex virus type 1 mRNA.  
527 *Journal of virology* 23(2):234-239.
- 528 43. Flavell AJ, Cowie A, Legon S, & Kamen R (1979) Multiple 5' terminal cap  
529 structures in late polyoma virus RNA. *Cell* 16(2):357-371.
- 530 44. Boone RF & Moss B (1977) Methylated 5'-terminal sequences of vaccinia virus  
531 mRNA species made in vivo at early and late times after infection. *Virology*  
532 79(1):67-80.
- 533 45. Faul EJ, Lyles DS, & Schnell MJ (2009) Interferon response and viral evasion by  
534 members of the family rhabdoviridae. *Viruses* 1(3):832-851.
- 535 46. Horwitz JA, Jenni S, Harrison SC, & Whelan SPJ (2020) Structure of a rabies  
536 virus polymerase complex from electron cryo-microscopy. *Proceedings of the*  
537 *National Academy of Sciences of the United States of America* 117(4):2099-  
538 2107.
- 539 47. Ogino M, Ito N, Sugiyama M, & Ogino T (2016) The Rabies Virus L Protein  
540 Catalyzes mRNA Capping with GDP Polyribonucleotidyltransferase Activity.  
541 *Viruses* 8(5).
- 542 48. Chandran K, Sullivan NJ, Felbor U, Whelan SP, & Cunningham JM (2005)  
543 Endosomal proteolysis of the Ebola virus glycoprotein is necessary for infection.  
544 *Science* 308(5728):1643-1645.
- 545 49. Cureton DK, Burdeinick-Kerr R, & Whelan SP (2012) Genetic inactivation of  
546 COPI coatomer separately inhibits vesicular stomatitis virus entry and gene  
547 expression. *Journal of virology* 86(2):655-666.
- 548 50. Cureton DK, Massol RH, Saffarian S, Kirchhausen TL, & Whelan SP (2009)  
549 Vesicular stomatitis virus enters cells through vesicles incompletely coated with



- 550 clathrin that depend upon actin for internalization. *PLoS pathogens*  
551 5(4):e1000394.
- 552 51. Whelan SP, Ball LA, Barr JN, & Wertz GT (1995) Efficient recovery of infectious  
553 vesicular stomatitis virus entirely from cDNA clones. *Proceedings of the National*  
554 *Academy of Sciences of the United States of America* 92(18):8388-8392.
- 555 52. Whelan SP & Wertz GW (2002) Transcription and replication initiate at separate  
556 sites on the vesicular stomatitis virus genome. *Proceedings of the National*  
557 *Academy of Sciences of the United States of America* 99(14):9178-9183.  
558  
559

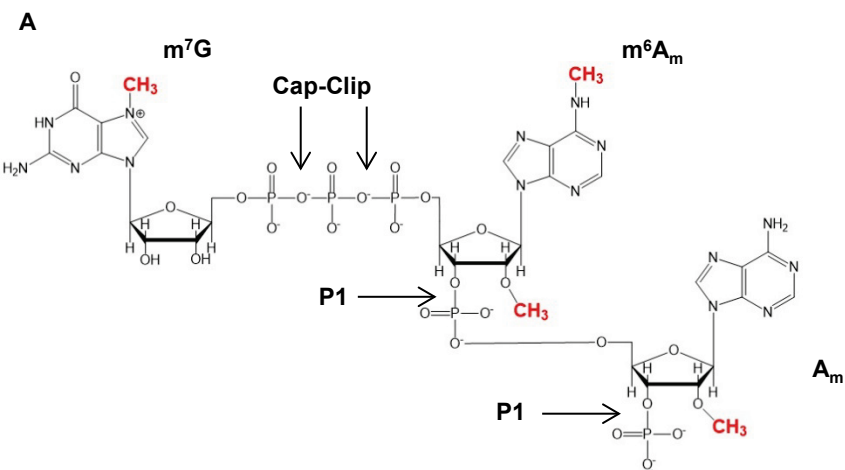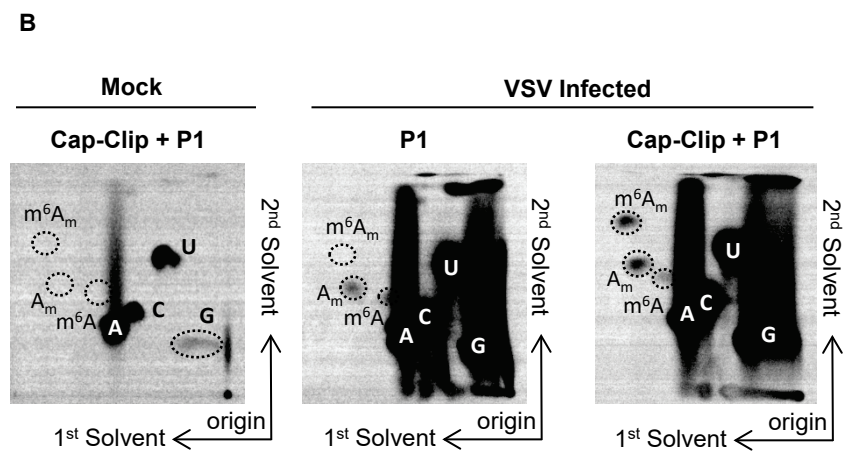

**Figure 1: VSV mRNAs contain a 5' m<sup>7</sup>Gpppm<sup>6</sup>A<sub>m</sub> cap-structure.**

**(A):** VSV mRNA cap-structures present in infected cells. VSV mRNAs contain the conserved 5' gene start sequence AACAG, including the m<sup>7</sup>GpppA<sub>m</sub> cap structures synthesized by the VSV polymerase, N6-methylation at the cap-proximal first nucleotide, and 2'O methylation at the second nucleotide made by the cell. Sites of nuclease P1 and cap-clip pyrophosphatase cleavage are marked. **(B):** VSV contains m<sup>6</sup>A<sub>m</sub> at the cap-proximal nucleotide. 293T cells were infected with VSV at a MOI of 3, cellular transcription halted by adding 10 µg ml<sup>-1</sup> actinomycin D at 2.5 hpi, and viral RNA labeled by metabolic incorporation of 100 µCi ml<sup>-1</sup> [<sup>32</sup>P] phosphoric acid from 3-7 hpi. Total cellular RNA was extracted and following poly(A) selection hydrolyzed by the indicated nucleases into monophosphates that were resolved by 2D-TLC and detected by phosphorimaging (representative image; n=3). Solvents run in the first and second dimensions are marked.

A

HeLa

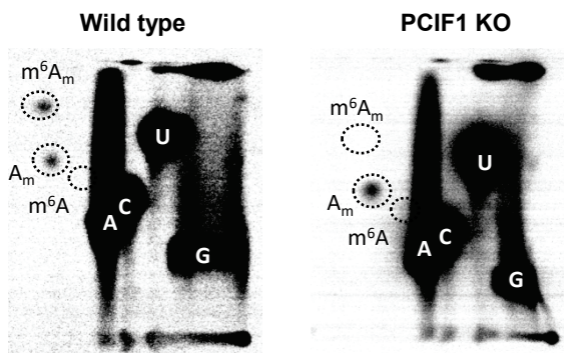

B

HeLa PCIF1 KO + Addback

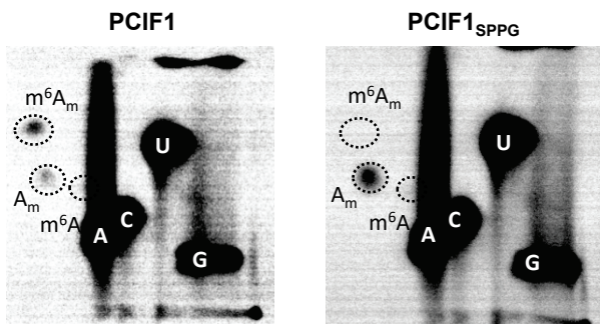

C

*In vitro* Methylation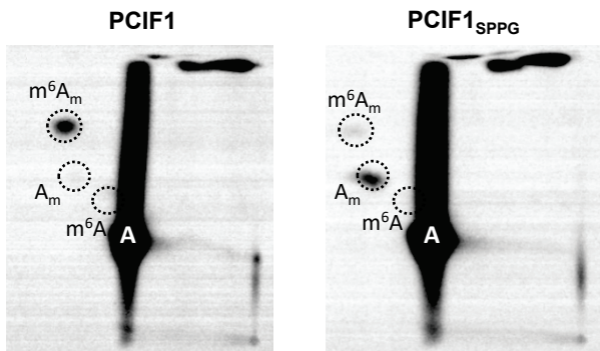

**Figure 2: PCIF1 is the cap-proximal N6-methyltransferase.**

**(A):** CRISPR-mediated PCIF1 knockout HeLa cells, or wild type parental cells, were infected with VSV at a MOI of 3. Viral RNA was radiolabeled and analyzed as in Fig 1 (representative images; n=3). **(B):** Add-back of PCIF1, but not a catalytically inactive mutant PCIF1<sub>SPPG</sub> restores m<sup>6</sup>A<sub>m</sub> on VSV mRNA. HeLa PCIF1 KO cells stably expressing 3X-FLAG-PCIF1, or 3X-FLAG-PCIF1<sub>SPPG</sub> were infected with VSV and RNA radiolabeled, digested, and 2D-TLC performed as in A (representative images; n=3). **(C):** PCIF1 N6-methylates VSV mRNA *in vitro*. Purified VSV mRNA, transcribed *in vitro* from viral particles in the presence of [<sup>32</sup>P]-α-ATP, was used as template for *in vitro* methylation with 50 nM purified PCIF1, or PCIF1<sub>SPPG</sub>. Following hydrolysis the products were visualized by 2D-TLC and phosphorimaging as in Fig 1 (representative images; n=3).

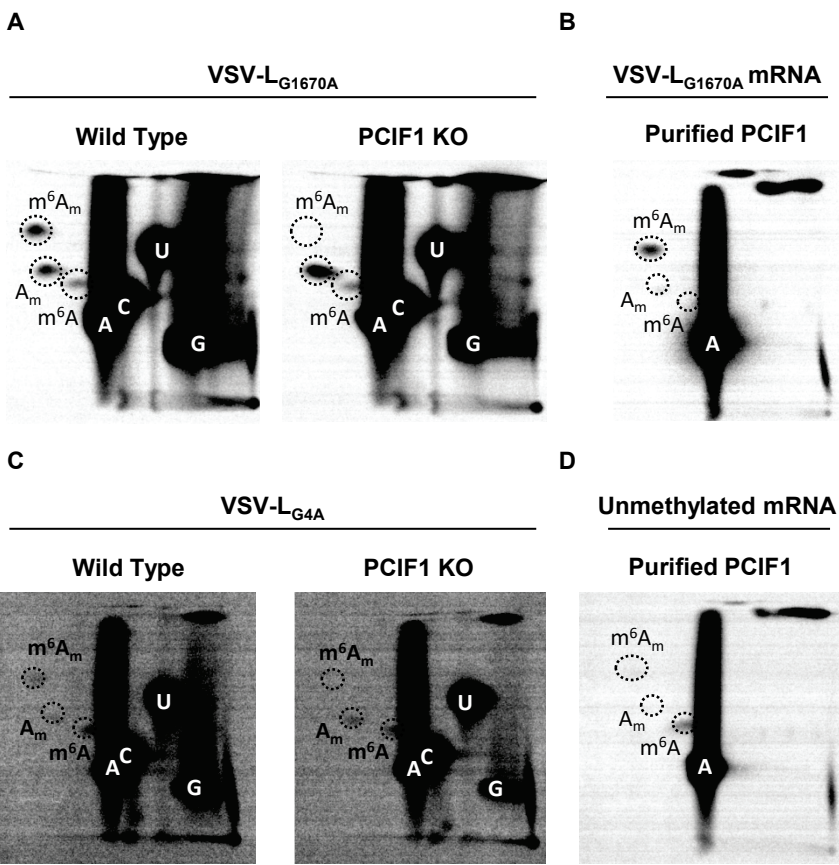

**Figure 3: Effect of mRNA cap methylation on PCIF1 modification of VSV mRNA.**

**(A):** The indicated 293T cells were infected with VSV-L<sub>G1670A</sub> at a MOI of 3 and viral RNA was radiolabeled, extracted and analyzed by 2D TLC as in Fig 2A (representative images, n=3). **(B):** Messenger RNA synthesized *in vitro* by VSV-L<sub>G1670A</sub> mRNA was incubated with purified PCIF1 and analyzed as in Fig 2C (representative image, n=3). **(C):** The indicated 293T cells were infected with VSV-L<sub>G4A</sub> as in panel A (representative images, n=3). **(D):** Messenger RNA synthesized by VSV *in vitro* in the presence of 200  $\mu$ M SAH, was used as substrate for PCIF1 *in vitro* and analyzed as in panel B (representative image, n=3)

**A**

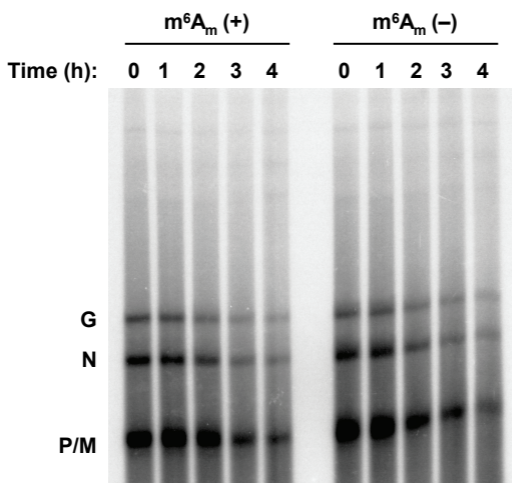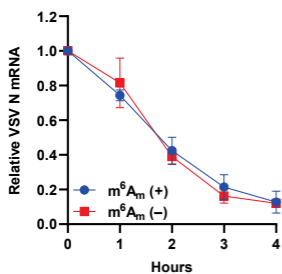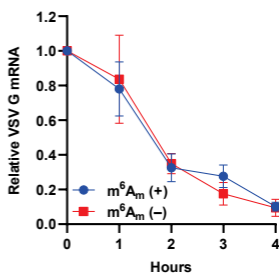

**B**

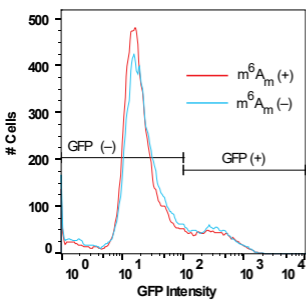

**C**

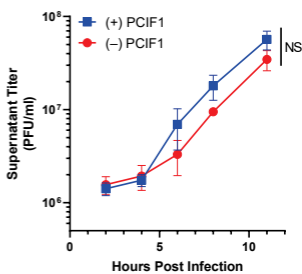



#### Figure 4: Effect on m<sup>6</sup>A<sub>m</sub> on viral mRNA translation and stability

**(A-B)** VSV mRNA isolated from PCIF1 KO 293T cells and methylated *in vitro* with PCIF1 prior to transfection of 500 ng of RNA into PCIF1 KO HeLa cells and assessed for **(A)**: mRNA stability by extraction from cells at the indicated time post-transfection and analyzed by electrophoresis on acid-agarose gels. A representative image is shown along with quantitative analysis of the abundance of the N and G mRNAs (n=3, +/-SD, 2-way ANOVA p>0.4). **(B)** mRNA translation by measurement of GFP positive cells and their intensity by flow cytometry (n=3, 0.95>p>0.18, student's t-test). **(C)** Viral replication assessed in PCIF1 KO HeLa cells expressing 3X-FLAG-PCIF1 or an empty vector infected at a MOI of 3. Viral titers were determined by plaque assay on Vero cells at the indicated time post inoculation. (n=3, +/-SD, NS – p>0.08, student's t-test, statistics shown are for the 11 h timepoint).

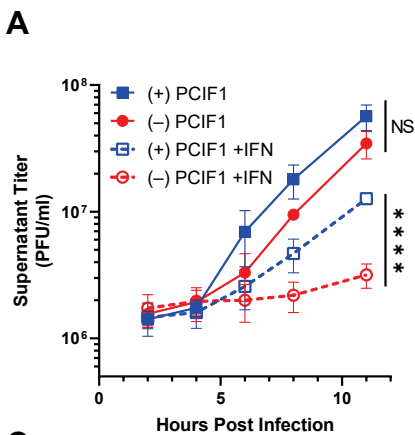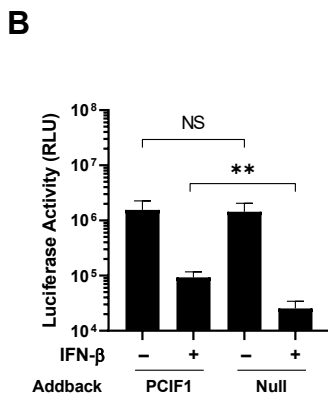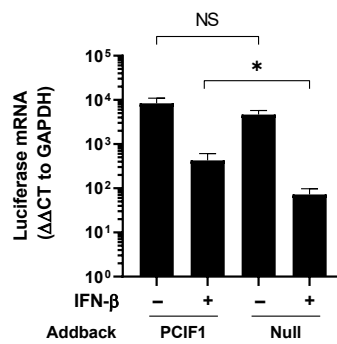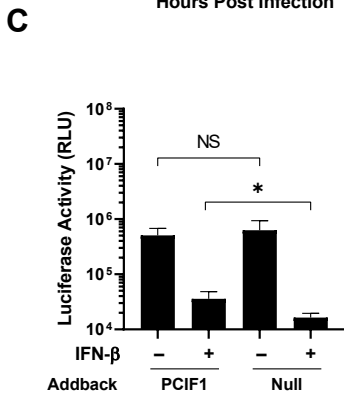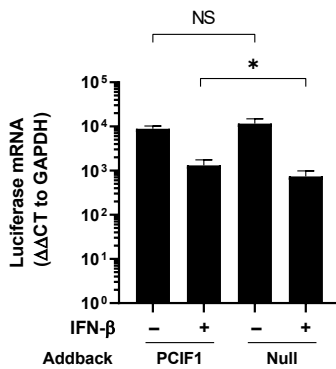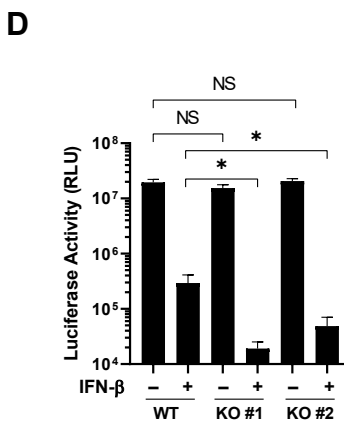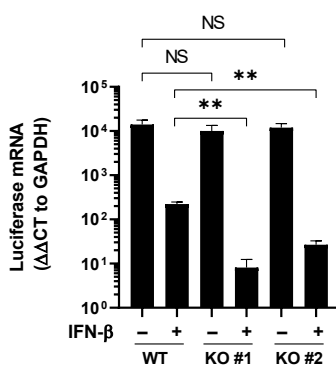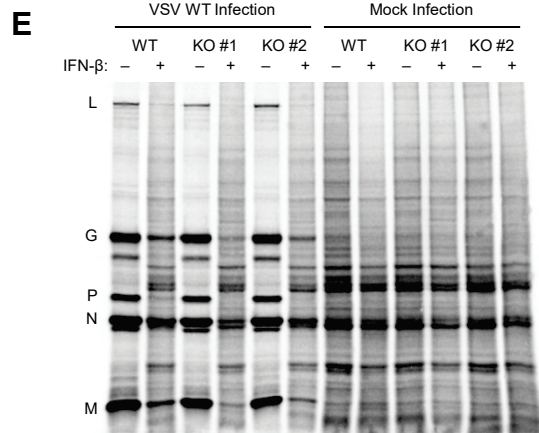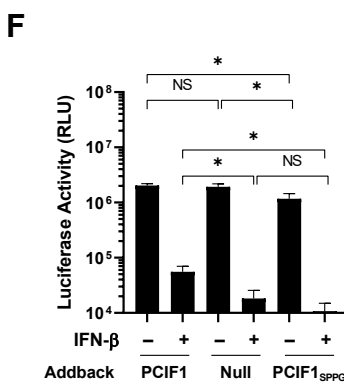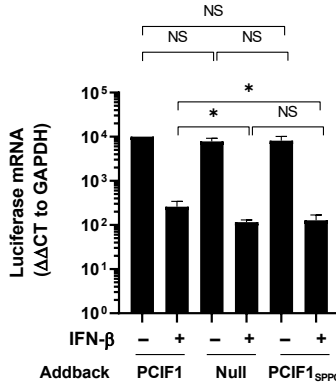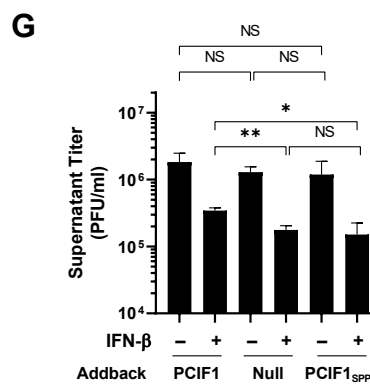

## Figure 5: Effect of IFN- $\beta$ pretreatment of cells on viral infection

**(A-C):** PCIF1 KO HeLa cells reconstituted with PCIF1 or an empty vector were pretreated with vehicle (0.1% BSA) or 500 U ml<sup>-1</sup> of interferon- $\beta$  for 5h and infected with the indicated VSV at a MOI of 3. **(A):** VSV viral titer was determined at the indicated timepoints by plaque assay on Vero cells (n=3, +/- SD, NS – p>0.08, \*\*\*\* p<0.0001, student's t-test). **(B):** Cells were infected with a VSV-Luciferase reporter and luciferase activity measured by luminometer at 6 hpi (n=4, +/-SD, NS – p>0.80, \*\* – p<0.01, student's t-test). Quantitative RT-PCR analysis of luciferase mRNA (normalized to GAPDH, n=4, +/-SD, NS – p>0.05, \* – p<0.05, student's t-test). **(C):** As in B, except cells were transfected with 500 ng ribonucleoprotein cores of VSV-Luc. (n=4, +/-SD, NS – p>0.19, \* – p<0.05, student's t-test). **(D):** The indicated A549 cells were pretreated with vehicle (0.1% BSA) or 500 U ml<sup>-1</sup> IFN- $\beta$  for 5 hours prior to infection with VSV-Luc at a MOI of 5. Cells were lysed 6 hpi and luciferase activity determined as in panel B (n=4, NS – 0.50>p>0.05, \* – p<0.05, student's t-test) and mRNA levels verified by qRT-PCR as in panel B (n=3, NS – 0.47>p>0.23, \* – p<0.05, \*\* - p<0.01, student's t-test). **(E):** As in panel D, with infection by VSV assessed by metabolic incorporation of [<sup>35</sup>S]-met and [<sup>35</sup>S]-cys into viral proteins as described in methods. Proteins were analyzed by SDS-PAGE and visualized by phosphorimager (representative image, n=3). **(F):** As in B, cells were reconstituted with PCIF1, PCIF1<sub>SPPG</sub> or empty vector (n=3, +/- SD, NS – 0.83>p>0.05, \* – p<0.05, student's t-test). **(G):** As in F, except cells were infected with VSV and viral titers measured at 11 hpi by plaque assay (n=3, +/- SD, NS – 0.83>p>0.29, \* – p<0.05, student's t-test).

**A**

**Standards**

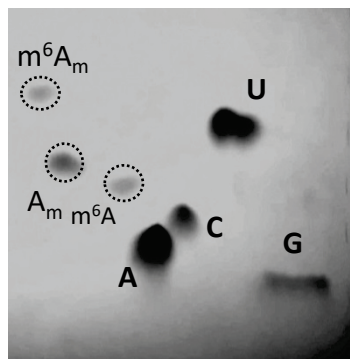

**B**

**Mock**

**VSV Infected**

**Cap-Clip + P1**

**P1**

**Cap-Clip + P1**

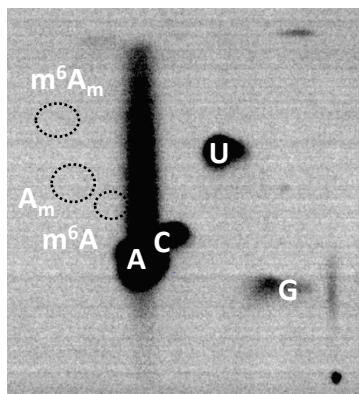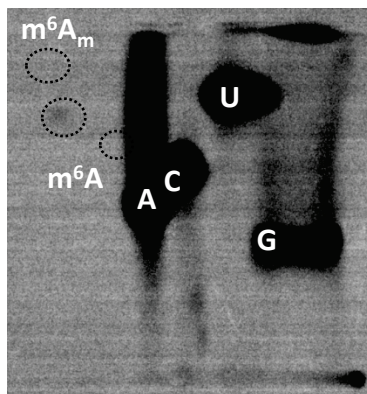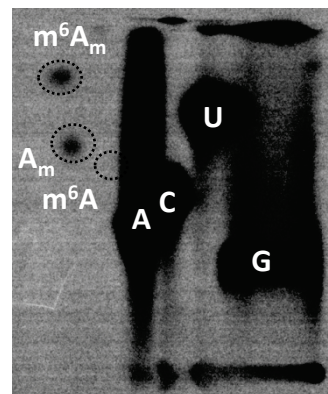

**C**

**PCIF1 KO: VSV Infected**

**D**

***In Vitro* Methylation Input**

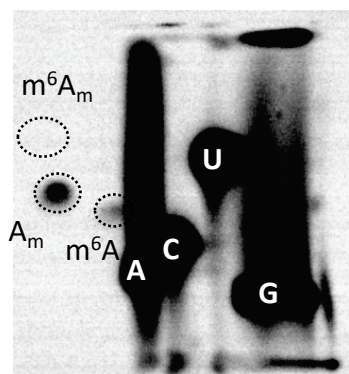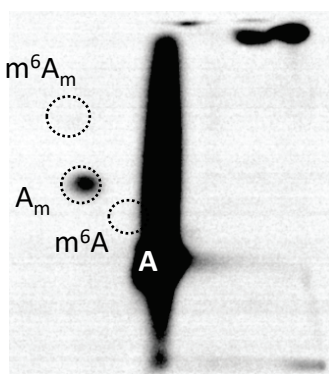

**Figure S1: VSV mRNAs in HeLa cells contain a 5' m<sup>7</sup>Gpppm<sup>6</sup>A<sub>m</sub> cap-structure.**

**(A):** Chemical standards used to identify nucleotide species visualized by UV shadowing (254 nm). **(B):** HeLa cells were infected with VSV at a MOI of 3, cellular transcription halted by adding 10 µg ml<sup>-1</sup> actinomycin D at 2.5 hpi, and viral RNA metabolically labeled with 100 µCi ml<sup>-1</sup> [<sup>32</sup>P] phosphoric acid from 3-7 hpi. RNA was extracted, poly(A) selected and incubated with the indicated nucleases and the products resolved by 2D-TLC and detected by phosphorimaging. Wild type HeLa cells (representative image; n=3). **(C):** 293T PCIF1 KO cells **(D):** In vitro transcribed VSV mRNA (input to Fig 2C).

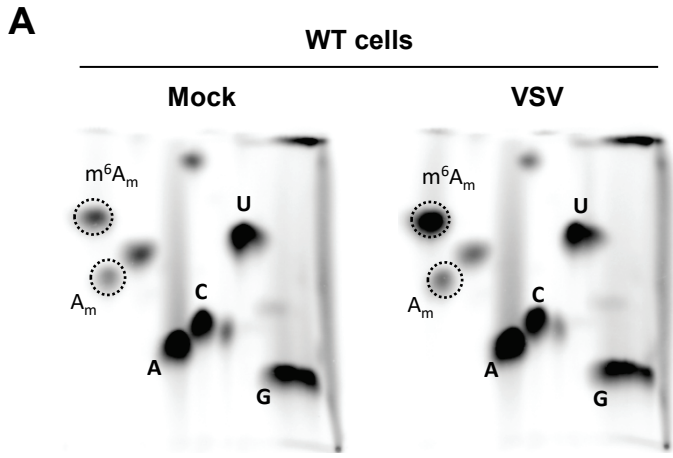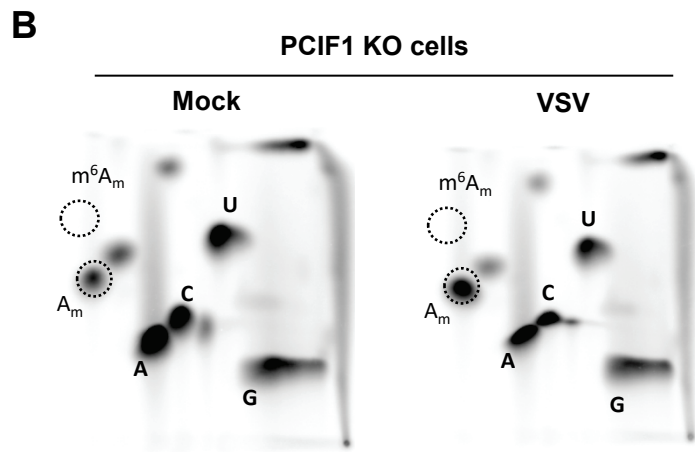

**Figure S2: PCIF1 methylates viral mRNA.** 293T cells were infected with VSV at a MOI of 3, poly(A)+ RNA purified at 6 hpi, and cap-proximal nucleotide identity determined by selective radiolabeling. Poly(A)+ RNA was decapped with Cap-Clip, and the exposed 5' phosphate of the cap-proximal nucleotide was radiolabeled with [<sup>32</sup>P] γ-ATP by sequential treatment with shrimp alkaline phosphatase and polynucleotide kinase. Hydrolyzed nucleotide monophosphates were resolved by 2D-TLC and detected by phosphorimaging (representative images; n=3). **(A):** Parental wild type 293T cells. **(B):** PCIF1 knockout 293T cells.

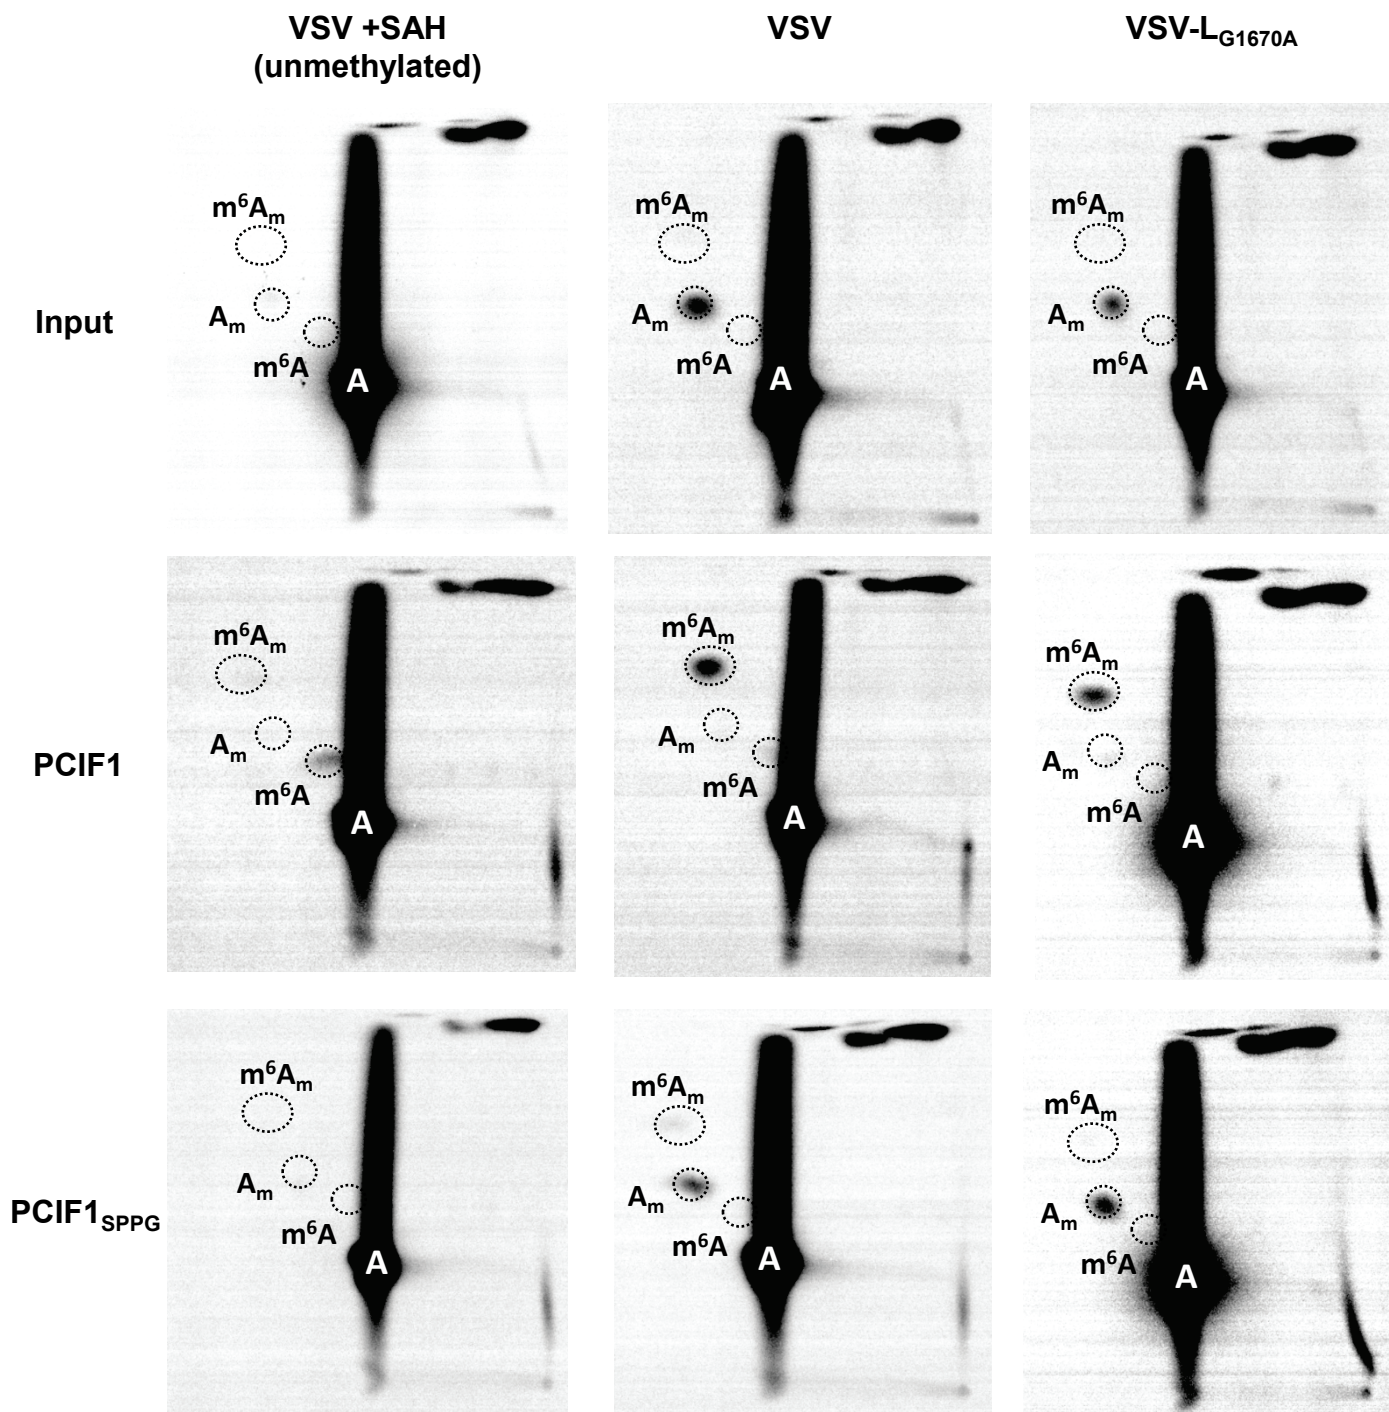



**Figure S3: Cap-methylation requirements for *in vitro* methylation of VSV mRNA.**

VSV mRNA was transcribed *in vitro* using purified virions from the indicated viruses used in Fig 3, and in the presence or absence of 200  $\mu$ M SAH (a methylation inhibitor) as noted, followed by *in vitro* methylation with no enzyme (“input”), purified PCIF1, or purified PCIF1<sub>SPPG</sub>. 2D-TLC was performed on the products to determine the relative amounts of m<sup>6</sup>A<sub>m</sub> and A<sub>m</sub> present (representative images; n=3).

**A**

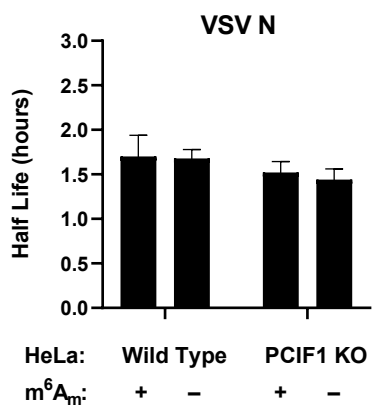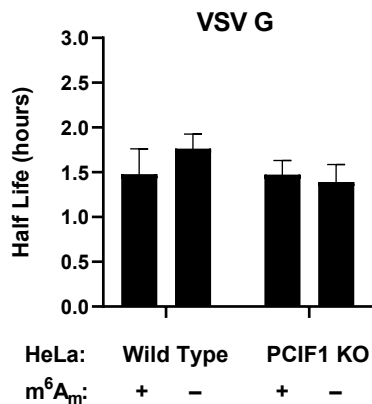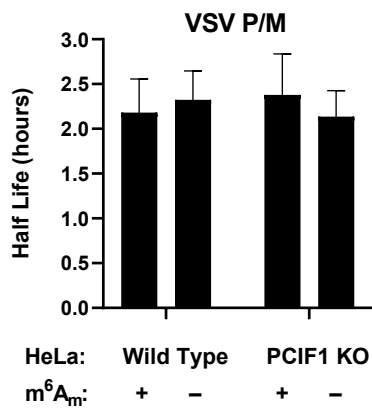

**B**

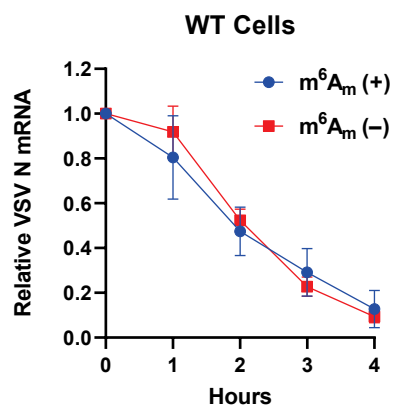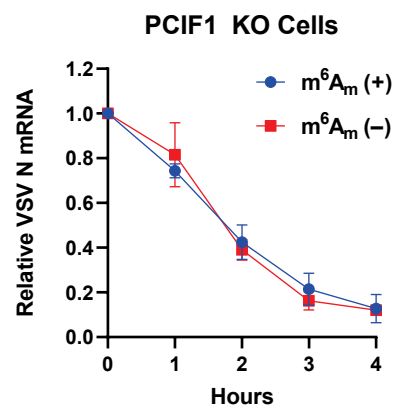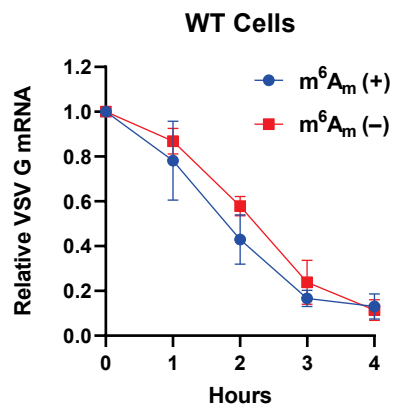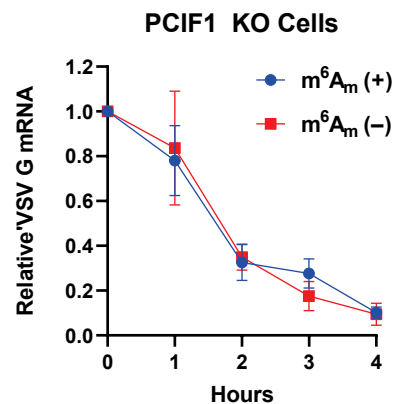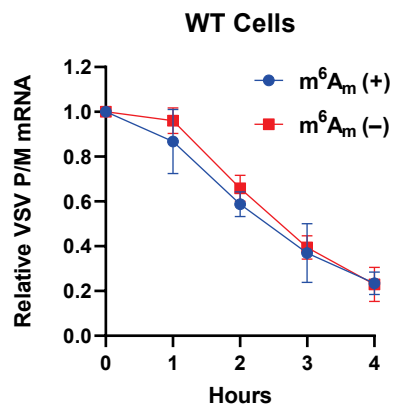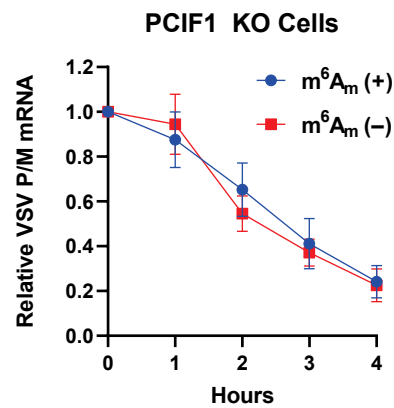

**Figure S4: Effect of m<sup>6</sup>A<sub>m</sub> on VSV mRNA stability.** Purified stocks of VSV radiolabeled mRNA were generated by infecting 293T PCIF1 KO cells at a MOI of 10 with VSV as in Fig 1, followed by purification. Purified RNA (500 ng) was in vitro methylated with PCIF1, transfected into HeLa cells and RNA amounts assessed by re-extraction from cells at the indicated times followed by electrophoresis on acid-agarose gels and phosphorimaging (see Fig 4). **(A):** mRNA half life calculated from each decay curve (n=3, +/- SD). **(B):** Decay curves used to calculate half lives. There is no significant difference between any decay curve (2 way ANOVA, 0.75>p>0.4), or calculated half life (student's t-test, 0.98 >p>0.06).

m<sup>6</sup>A<sub>m</sub> (+)

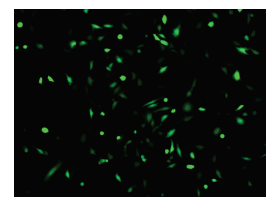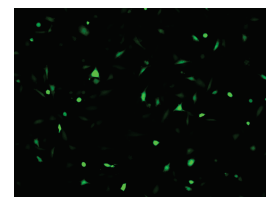

m<sup>6</sup>A<sub>m</sub> (-)

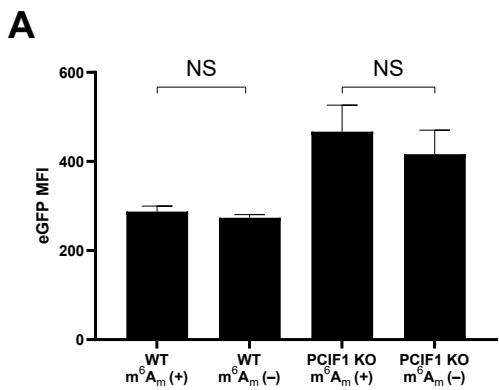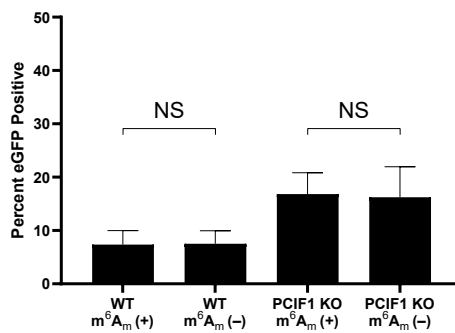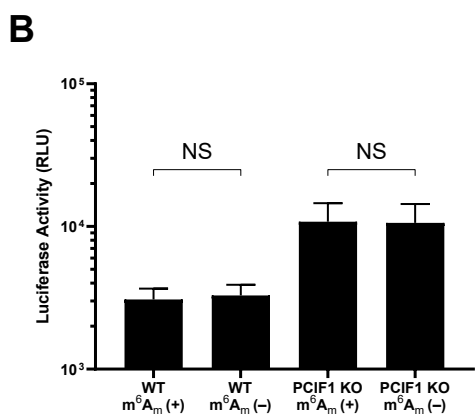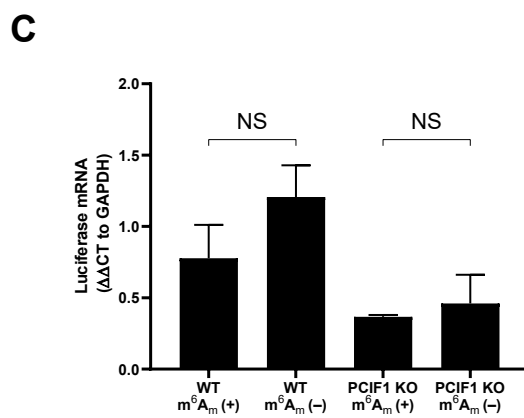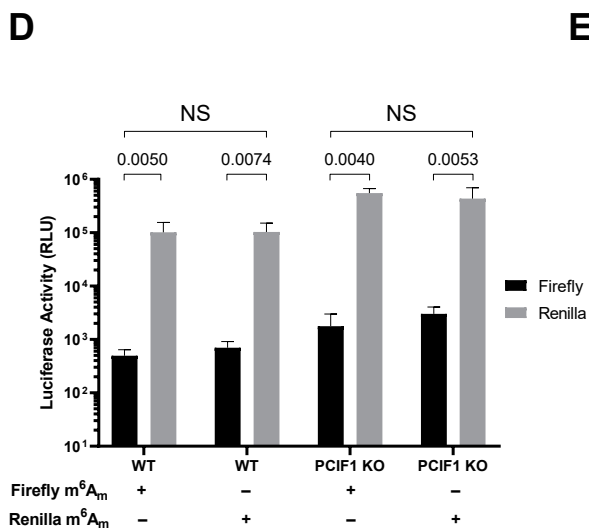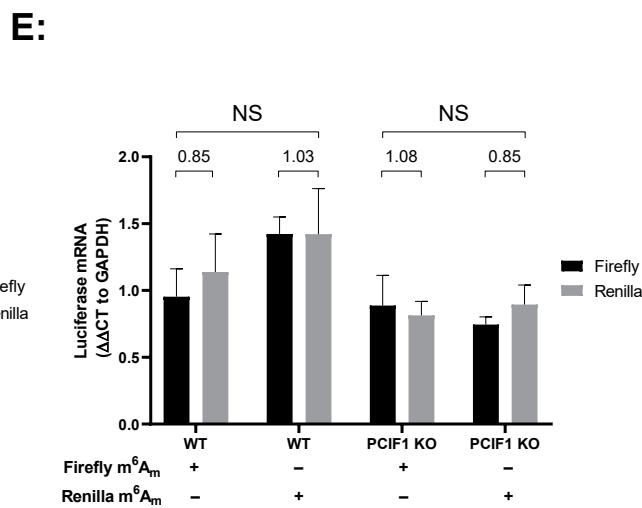

**Figure S5: Effect of m<sup>6</sup>A<sub>m</sub> on translation of VSV mRNA reporters.** Purified stocks of VSV mRNA from the indicated virus were generated by infecting 293T PCIF1 KO cells at a MOI of 10 with VSV as in Fig 4, followed by purification of extracted RNA by poly(A) selection and a biotinylated oligonucleotide against the conserved VSV-stop sequence. 500 ng RNA was then mock or in vitro methylated with purified PCIF1, and transfected into HeLa wild type or PCIF1 knockout cells. **(A):** N6-methylation does not impact translation of a GFP reporter. VSV-eGFP mRNA was transfected into cells, and flow cytometry performed at 6 hpi. Mean fluorescence intensity (n=3, +/- SD, NS – p>0.18, student's t-test,) and percent GFP positive cells (n=3, +/- SD, NS – p>0.89, student's t-test) are shown, with a representative fluorescence microscopy image of transfected cells. **(B):** N6-methylation does not impact translation of a luciferase reporter. 500 ng VSV-luciferase mRNA with the indicated methylation was transfected into the indicated HeLa cells. Cells were lysed at 6 hpi, and luciferase levels were measured using a Promega Luciferase Assay kit (n=3, +/- SD, NS – p>0.70, student's t-test). **(C):** RNA was extracted from lysate from (B), RT-PCR performed with oligo-dT primers, and qPCR performed for luciferase RNA (n=3, normalized to GAPDH, +/- SD, NS – p>0.08, student's t-test). **(D):** Translation of an m<sup>6</sup>A<sub>m</sub> (+) reporter does not outcompete a co-transfected m<sup>6</sup>A<sub>m</sub> (-) reporter. 300 ng purified VSV-Luc (firefly) and VSV-RenP (renilla) mRNAs with opposing methylation status (m<sup>6</sup>A<sub>m</sub> (+) firefly with m<sup>6</sup>A<sub>m</sub> (-) renilla, and vice versa) were transfected into the indicated HeLa cells for 8 hours. Cells were lysed and luciferase levels of both reporters using a Promega Dual-Luciferase kit. Relative luminescence units (RLU) are shown (n=3, +/- SD, NS – 0.98 >p>0.11, student's t-test). Ratios of Firefly to Renilla are shown above each condition. **(E):** No change in

luciferase RNA levels from (D). RNA from (D) was extracted and qPCR performed as in C for Firefly and Renilla luciferase transcripts (n=3, normalized to GAPDH, +/- SD, 0.49>p >0.05, student's t-test).

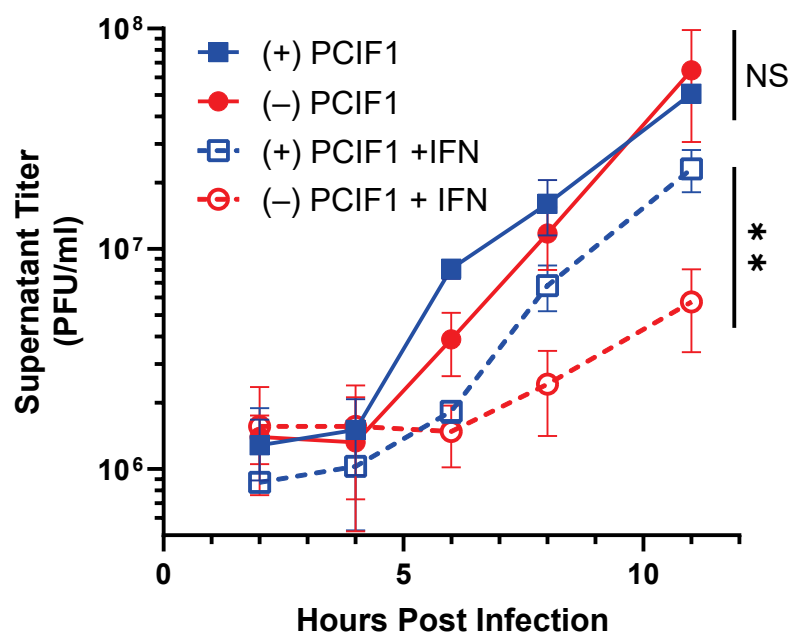

**Figure S6: Effect of IFN- $\beta$  pretreatment of cells on viral infection in a second *PCIF1*-addback clone**

PCIF1 KO HeLa cells (different single cell clone from Fig 4C, 5A) reconstituted with PCIF1 or an empty vector were pretreated with vehicle (0.1% BSA) or 500 U ml<sup>-1</sup> interferon- $\beta$  for 5h. Treatment media was removed from the cells, followed by infection with VSV WT at a MOI of 3. After 1 hour, the inoculum was removed, cells washed, and initial treatment media added back to cells. At 2, 4, 6, 8, and 11 hpi, 1% of the supernatant was removed, and plaque assays performed on Vero cells to determine the titer of VSV in each sample. Growth curve of supernatant virus (n=3, +/-SD. NS – p>0.51, \*\* - p<0.01, student's t-test. Statistics shown are for the 11h timepoint).



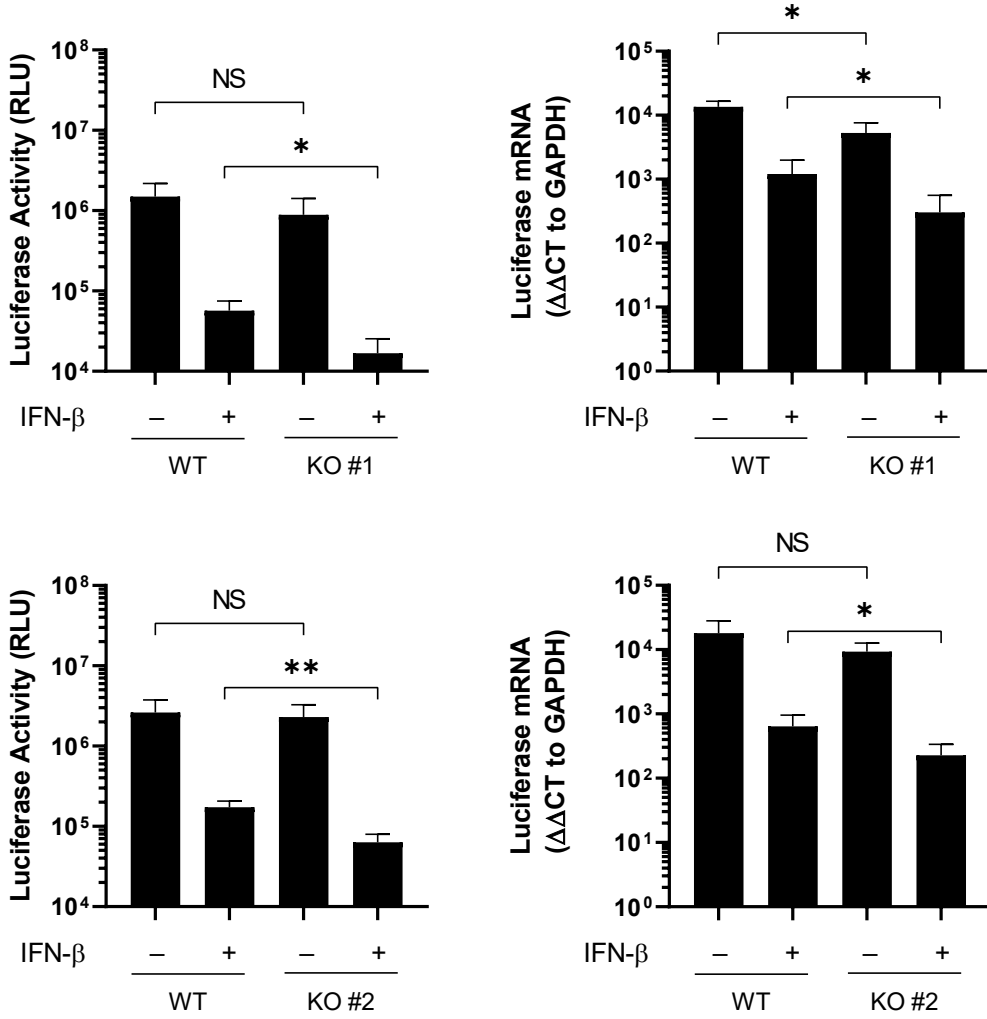

**Figure S7: Effect of IFN- $\beta$  pretreatment of cells on viral infection in multiple single-cell clones of PCIF1 KO cells.**

Wild type (parental) HeLa or PCIF1 KO cells (two independent clones) were pretreated with IFN- $\beta$  for 5h, then infected with VSV expressing a luciferase reporter (VSV-Luc) at a MOI of 3. Cells were lysed at 6 hpi. Half the lysate was used to measure luciferase using a Promega Luciferase Assay kit (n=4, NS – p>0.20, \* - p<0.05, \*\* - p<0.01, student's t-test). RNA was extracted from the other half in Trizol and RT-PCR performed using oligo-dT, followed by qPCR for luciferase mRNA (normalized to GAPDH, n=4, NS – p>0.18, \* - p<0.05, \*\* - p<0.01, student's t-test).

WT

PCIF1 KO

P1

Cap-Clip + P1

Cap-Clip + P1

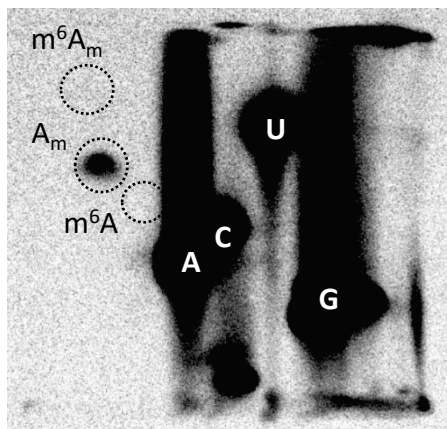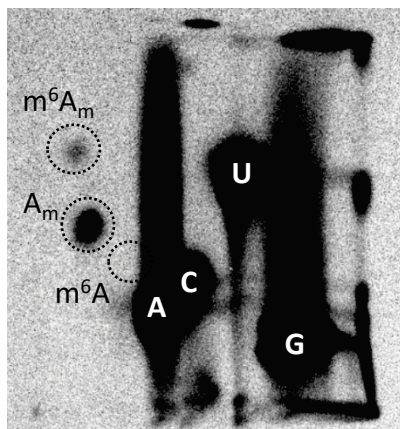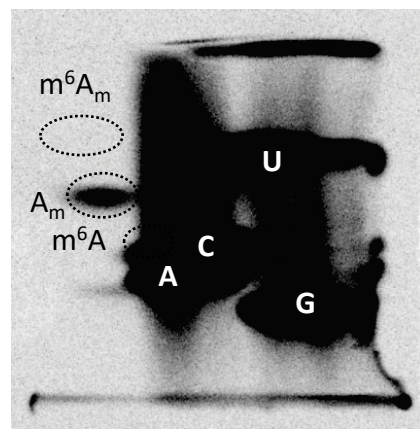

**Figure S8: VSV mRNA in A549 cells contain m<sup>6</sup>A<sub>m</sub>**

A549 WT or PCIF1 KO cells were infected with VSV at a MOI of 5, and viral mRNA specifically radiolabeled, extracted, and digested as in Fig 2A. Released nucleotide monophosphates were resolved by 2D-TLC and detected by phosphorimaging (representative images, n=3) **(A)** VSV mRNA from wild type cells digested with the indicated enzymes. **(B)** VSV mRNA from PCIF1 KO cells.

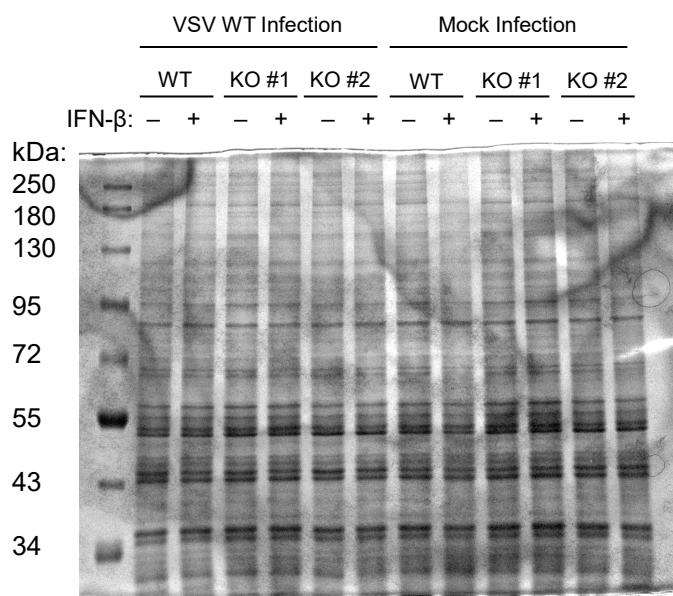

**Figure S9: Loading control and protein markers for Fig 5D.**

Gels used for PAGE-analysis of radiolabeled products in Fig 5D were stained with 0.25% Coomassie Brilliant Blue G-250 in 10% acetic acid, followed by destaining in 10% acetic acid. Gels were visualized by OD laser scanning on a GE Typhoon 5. Staining indicated even protein loading (representative image shown corresponding to autoradiogram in Fig 5D, n=3).

**Table S1: Oligonucleotides used for qPCR or mRNA selection**

| <b>Primer</b>        | <b>Direction</b> | <b>Sequence</b>               |
|----------------------|------------------|-------------------------------|
| Firefly Luciferase   | Forward          | CAACTGCATAAGGCTATGAAGAGA      |
| Firefly Luciferase   | Reverse          | ATTTGTATTCAGCCCATATCGTTT      |
| Renilla Luciferase   | Forward          | GAGCATCAAGATAAGATCAAAGCA      |
| Renilla Luciferase   | Reverse          | CTTCACCTTTCTCTTTGAATGGTT      |
| eGFP                 | Forward          | GAACCGCATCGAGCTGAA            |
| eGFP                 | Reverse          | TGCTTGTGCGCCATGATATAG         |
| IFIT1                | Forward          | AACTTAATGCAGGAACATGACAA       |
| IFIT1                | Reverse          | CTGCCAGTCTGCCCCATGTG          |
| GAPDH                | Forward          | AGCCTCAAGATCATCAGCAAT         |
| GAPDH                | Reverse          | ATGGACTGTGGTCATGAGTCCTT       |
| Biotin-T(16)-VSVstop |                  | 5'biotin-TTTTTTTTTTTTTTTTCATA |
